# Supplementary material for: Novel TDP1 Inhibitors: Disubstituted Thiazolidine-2,4-Diones Containing Monoterpene Moieties
Source: MDPI journal article supplement (doi:10.3390/ijms24043834), 2023-02-14
Supplement: s1 [file s1]

## Supplementary Materials

# Novel TDP1 Inhibitors: Disubstituted Thiazolidine-2,4-diones Containing Monoterpene Moieties

Dmitry I. Ivankin <sup>1</sup>, Tatyana E. Kornienko <sup>2</sup>, Marina A. Mikhailova <sup>3</sup>, Nadezhda S. Dyrkheeva <sup>2</sup>, Alexandra L. Zakharenko <sup>2</sup>, Chigozie Achara <sup>4</sup>, Jóhannes Reynisson <sup>4</sup>, Victor M. Golyshev <sup>2</sup>, Olga A. Luzina <sup>1</sup>, Konstantin P. Volcho <sup>1,\*</sup>, Nariman F. Salakhutdinov <sup>1,3</sup> and Olga I. Lavrik <sup>2,3</sup>

- <sup>1</sup> N.N. Vorozhtsov Novosibirsk Institute of Organic Chemistry, Siberian Branch of the Russian Academy of Science, 9, Akademika Lavrentieva Ave., 630090 Novosibirsk, Russia  
<sup>2</sup> Institute of Chemical Biology and Fundamental Medicine, Siberian Branch of the Russian Academy of Science, 8, Akademika Lavrentieva Ave., 630090 Novosibirsk, Russia  
<sup>3</sup> Department of Natural Sciences, Novosibirsk State University, 630090 Novosibirsk, Russia  
<sup>4</sup> School of Pharmacy and Bioengineering, Keele University, Hornbeam Building, Newcastle-under-Lyme, Staffordshire ST5 5BC, UK  
\* Correspondence: volcho@nioch.nsc.ru

### Table of contents

|                                                                                                                                                                                              |                       |
|----------------------------------------------------------------------------------------------------------------------------------------------------------------------------------------------|-----------------------|
| <sup>1</sup> H, <sup>13</sup> C NMR, and DFS spectra of compounds                                                                                                                            | <b>Figures S1-S54</b> |
| Circular dichroism spectroscopy experiments                                                                                                                                                  | <b>Figure S55</b>     |
| UV-vis absorbtion spectra of compounds                                                                                                                                                       | <b>Figure S56-S62</b> |
| The binding affinities as predicted by the scoring functions used to the catalytic TDP1 binding pocket and their measured IC <sub>50</sub> values.                                           | <b>Table S1</b>       |
| The correlation plot of measured IC <sub>50</sub> values against their CS counterparts.                                                                                                      | <b>Figure S63</b>     |
| The molecular descriptors and their corresponding Known Drug Indexes 2a and 2b (KDI <sub>2a/2b</sub> ).                                                                                      | <b>Table S2</b>       |
| Definition of lead-like, drug-like and Known Drug Space (KDS) in terms of molecular descriptors. The values given are the maxima for each descriptor for the volumes of chemical space used. | <b>Table S3</b>       |

## Chemistry

### Compound 18e.

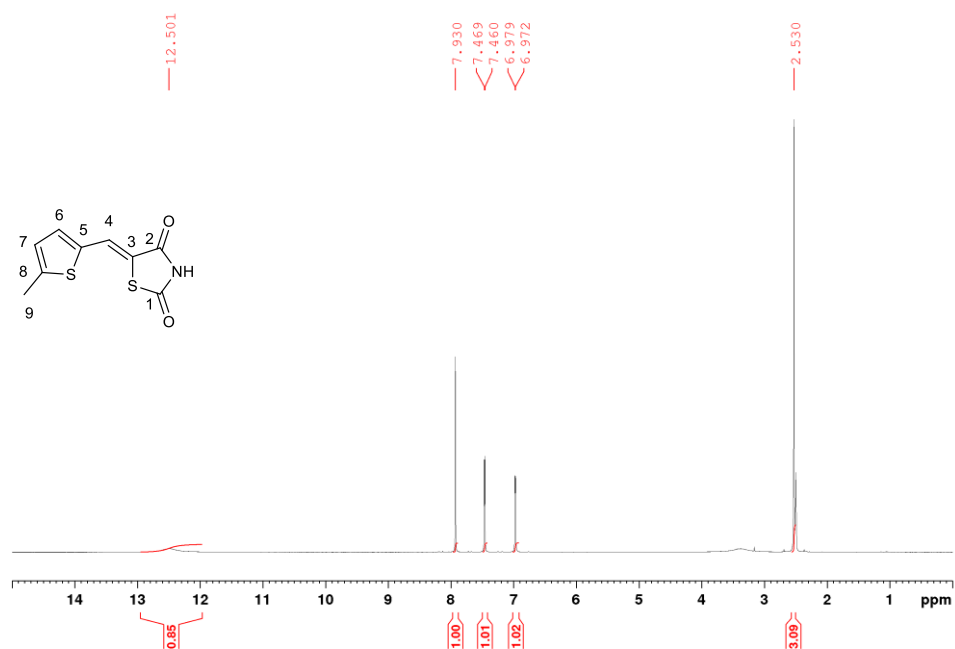

Figure S1. The <sup>1</sup>H NMR spectrum of 18e.

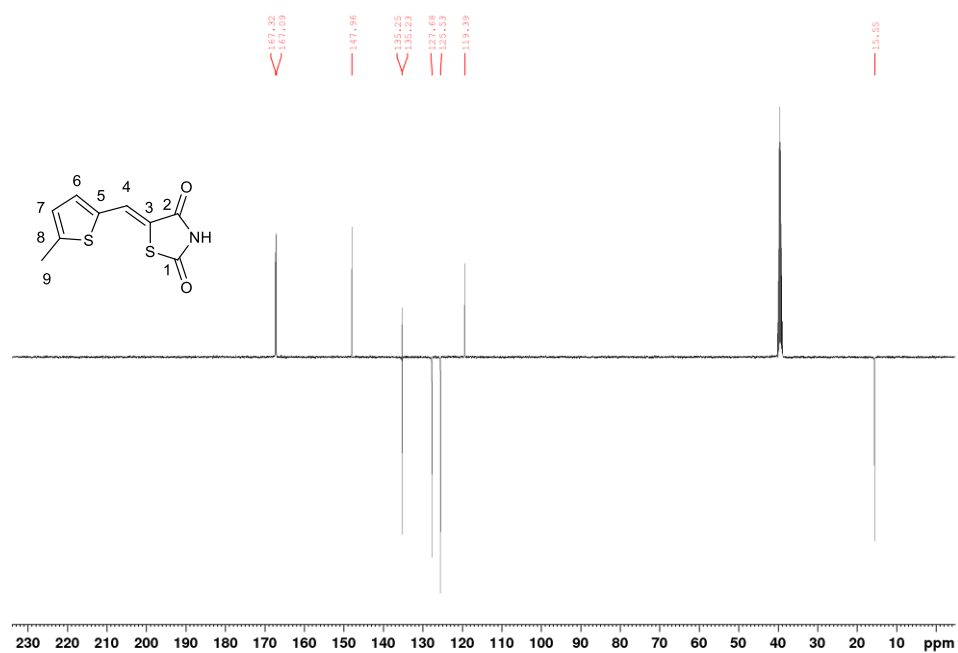

Figure S2. The <sup>13</sup>C NMR spectrum of 18e.

AA-404 #2 RT: 0.07 AV: 1 NL: 3.91E7  
T: + c EI Full ms [ 14.50-270.50]

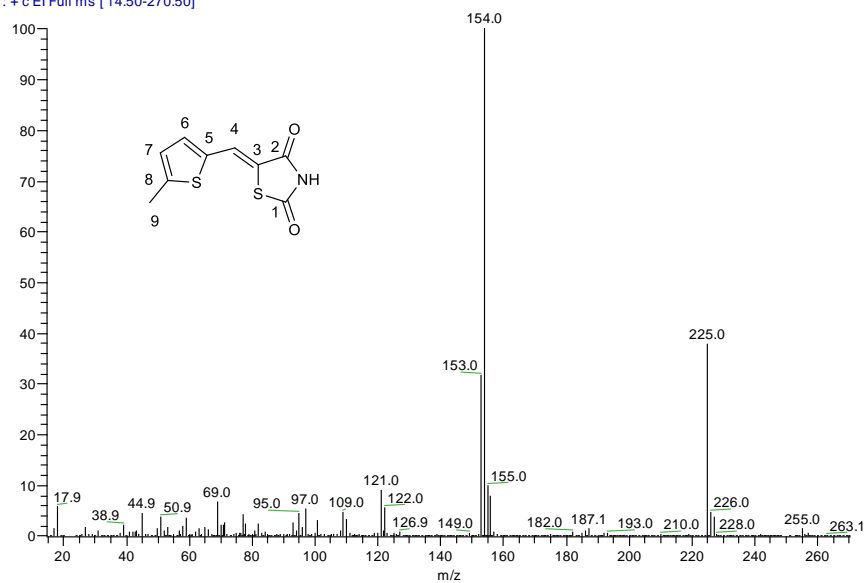

Figure S3. The DFS spectrum of 18e.

Compound 21a.

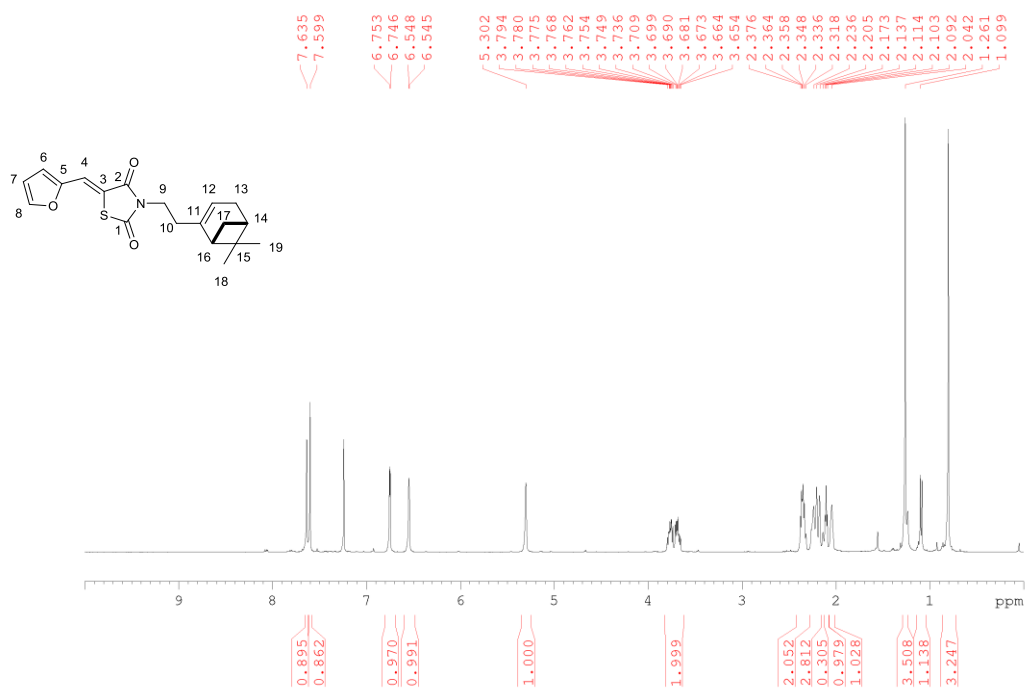

Figure S4. The <sup>1</sup>H NMR spectrum of 21a.

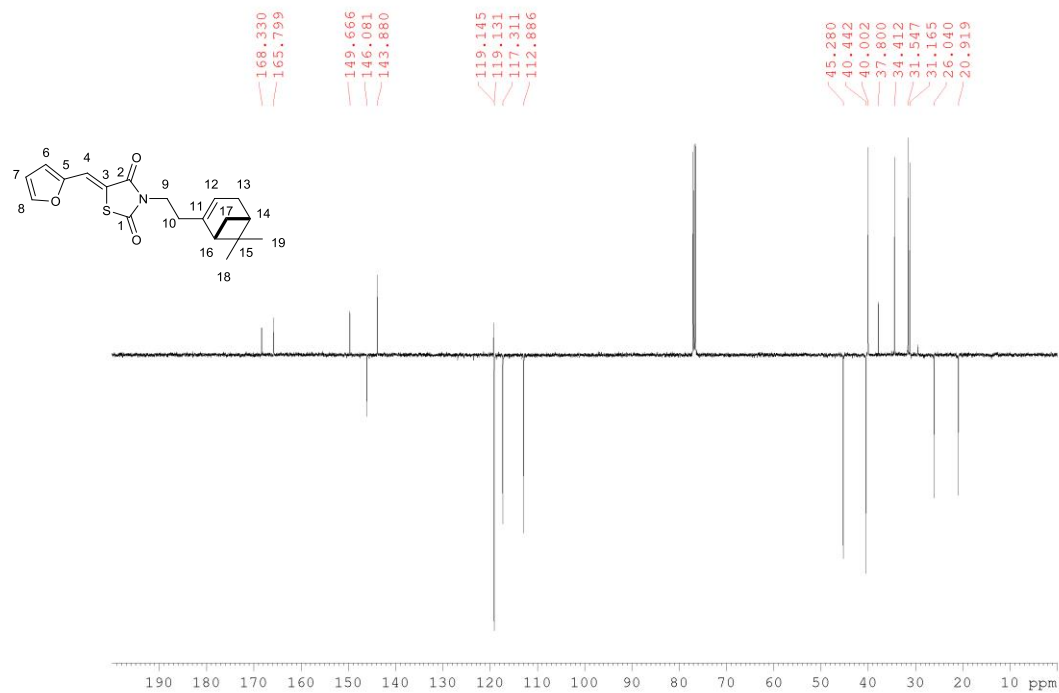

**Figure S5.** The  $^{13}\text{C}$  NMR spectrum of 21a.

AA63 #26 RT: 1.62 AV: 1 NL: 1.71E7  
T: + c EI Full ms [32.50-380.50]

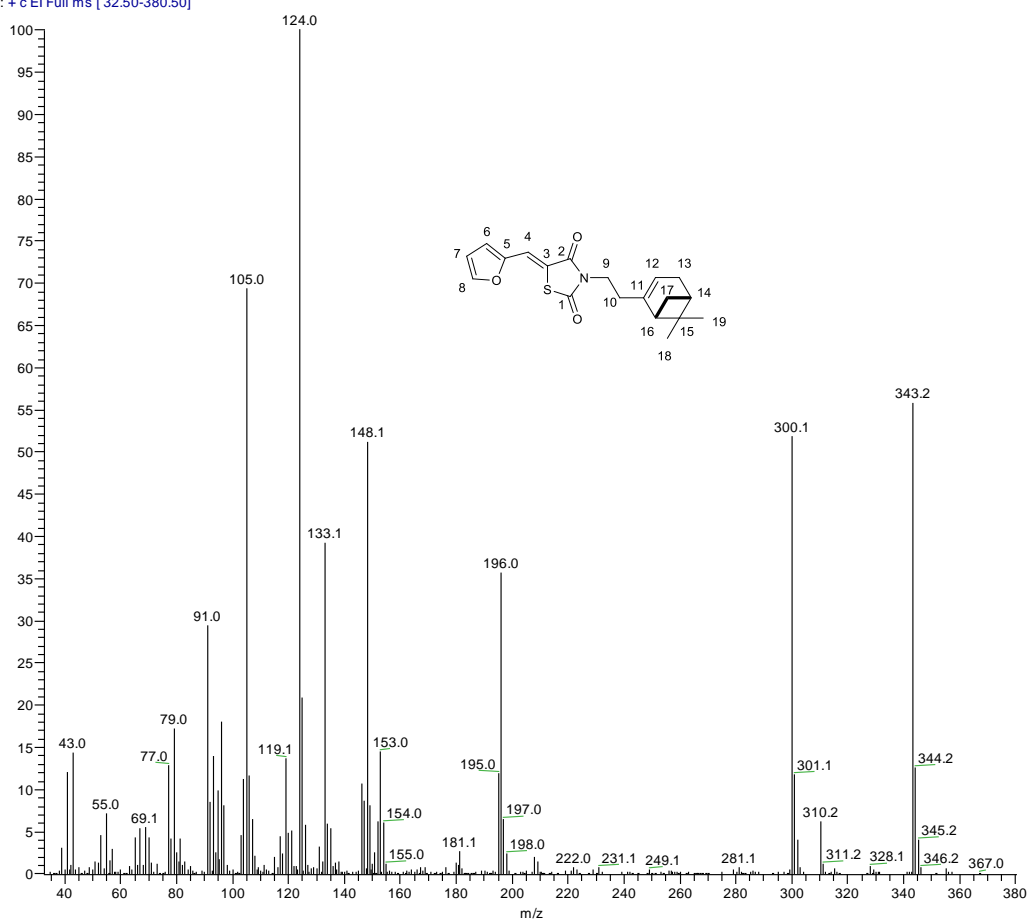

**Figure S6.** The DFS spectrum of 21a.

Compound **19b**.

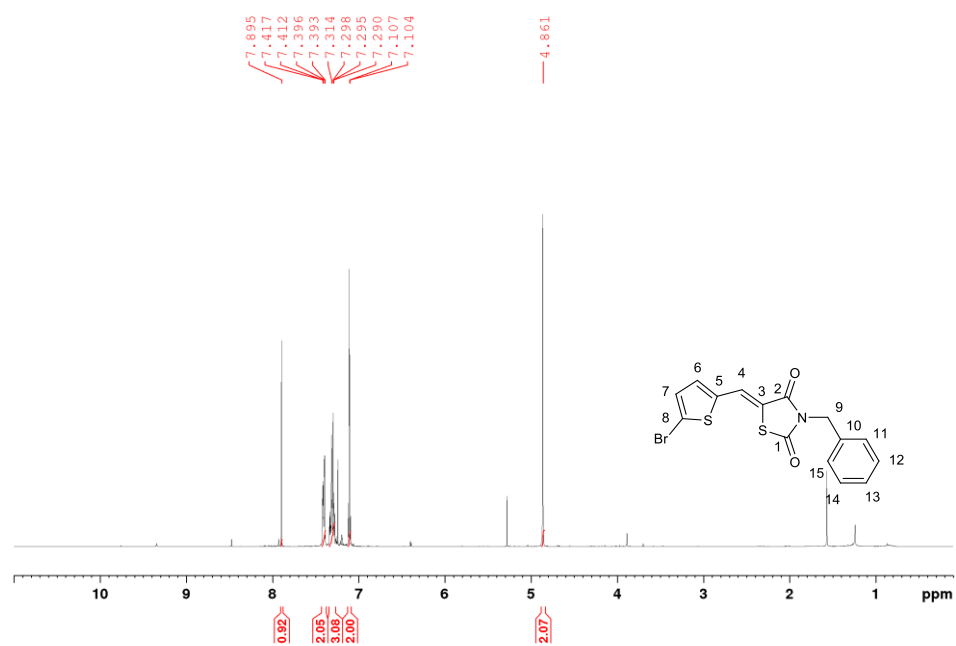

Figure S7. The <sup>1</sup>H NMR spectrum of **19b**.

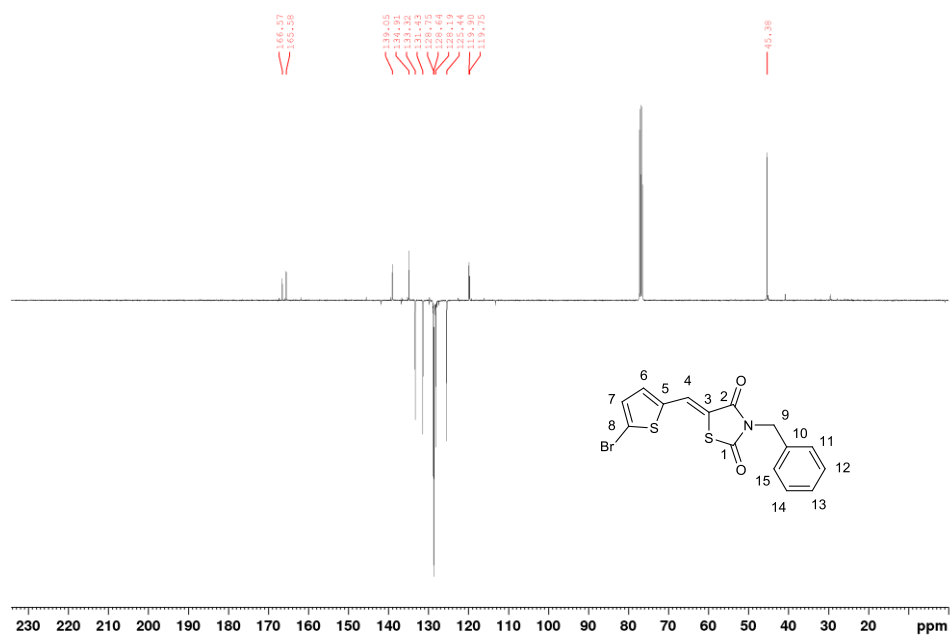

Figure S8. The <sup>13</sup>C NMR spectrum of **19b**.

AA-359 #7 RT: 0.17 AV: 1 NL: 8.77E6  
T: + c EI Full ms [14.50-400.50]

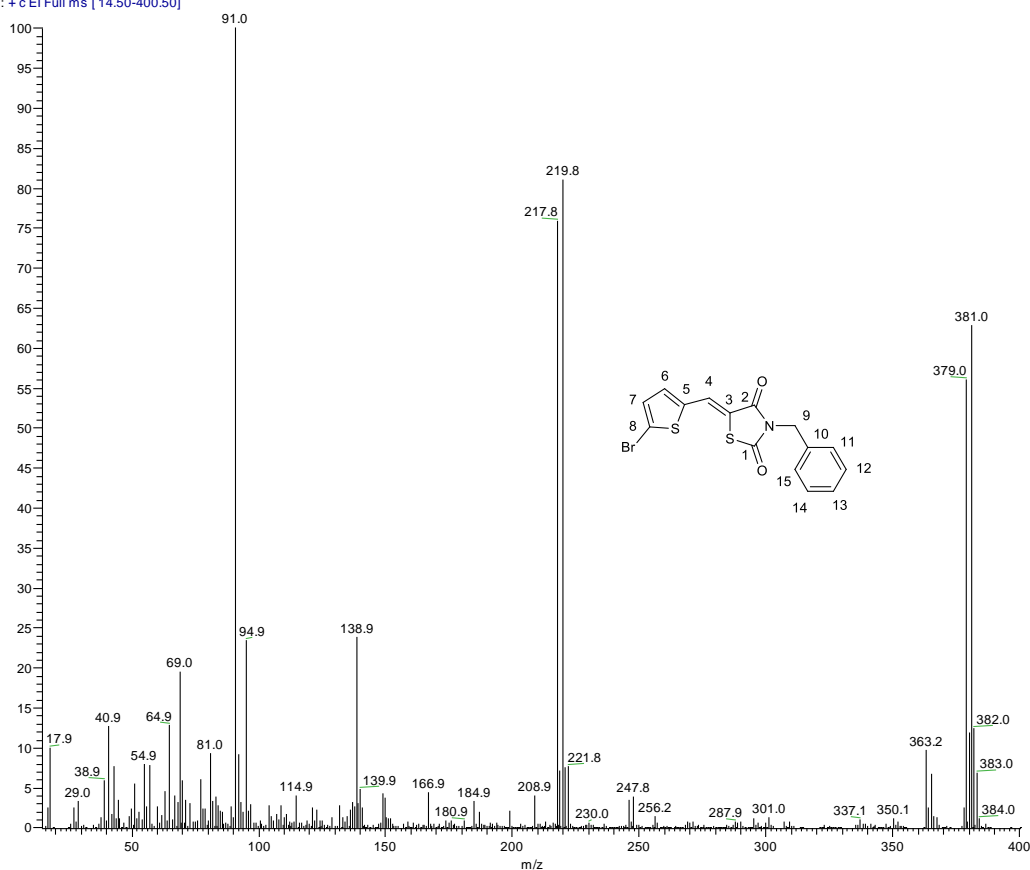

Figure S9. The DFS spectrum of **19b**.

Compound **20b**.

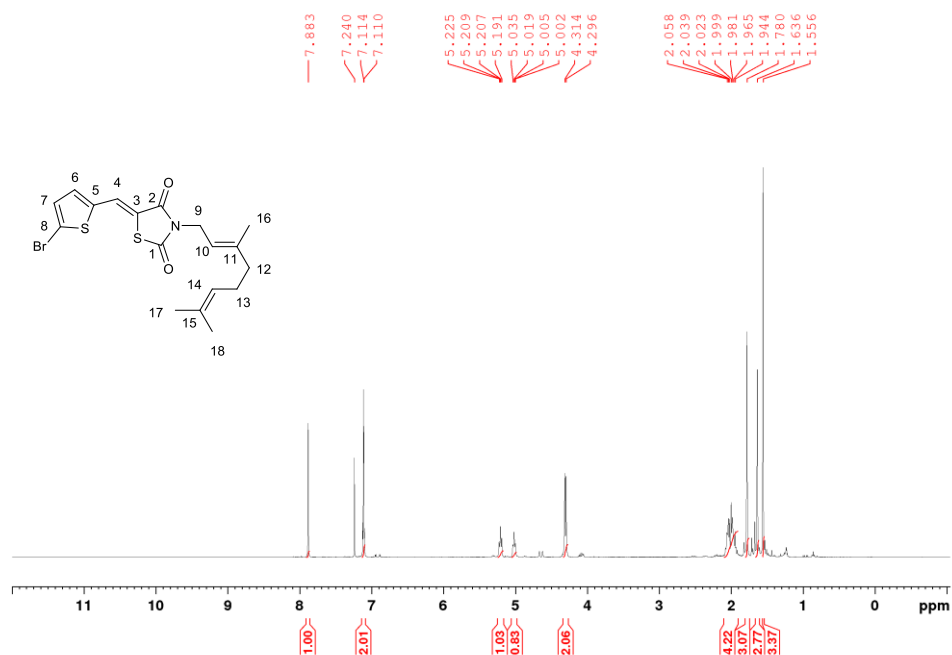

Figure S10. The  $^1\text{H}$  NMR spectrum of **20b**.

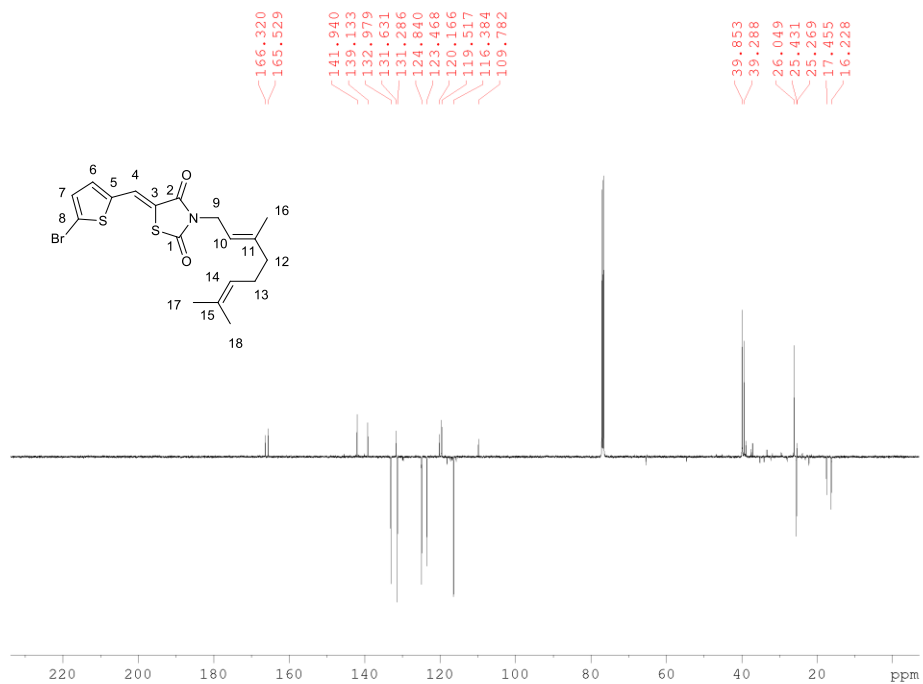

**Figure S11.** The  $^{13}\text{C}$  NMR spectrum of **20b**.

AA-360 #17 RT: 1.21 AV: 1 NL: 6.25E7  
T: + c EI Full ms [ 14.50-470.50]

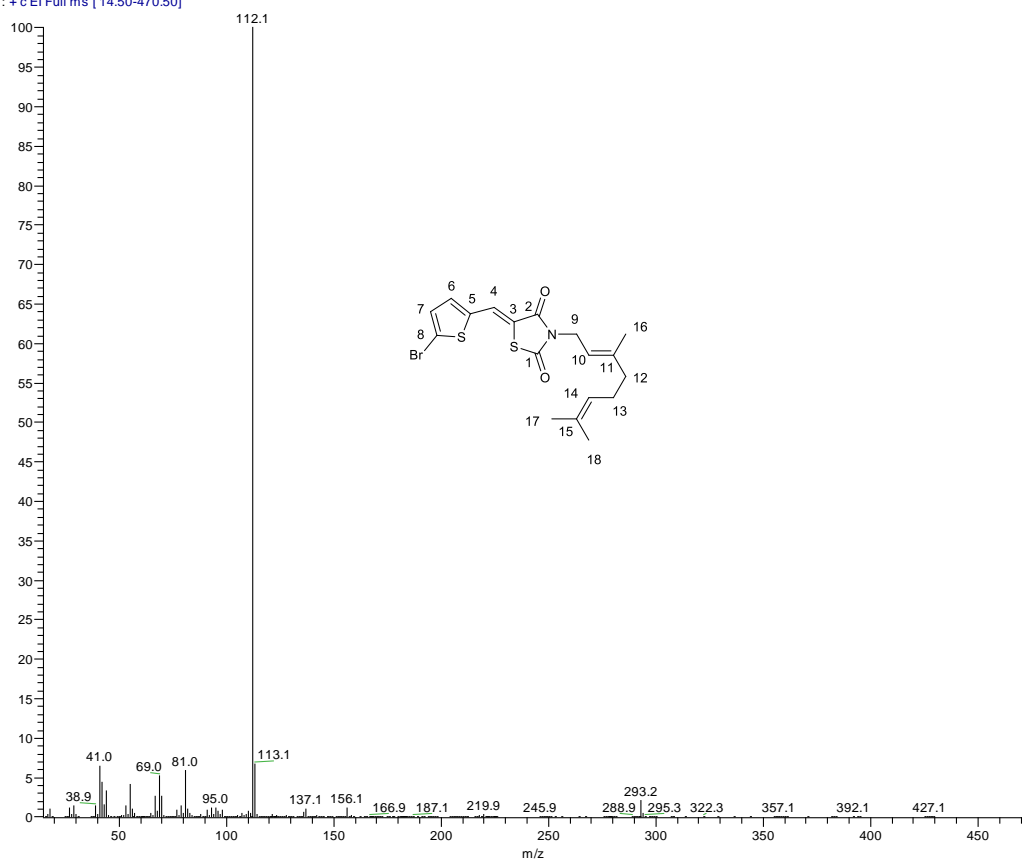

**Figure S12.** The DFS spectrum of **20b**.

*Compound 21b.*

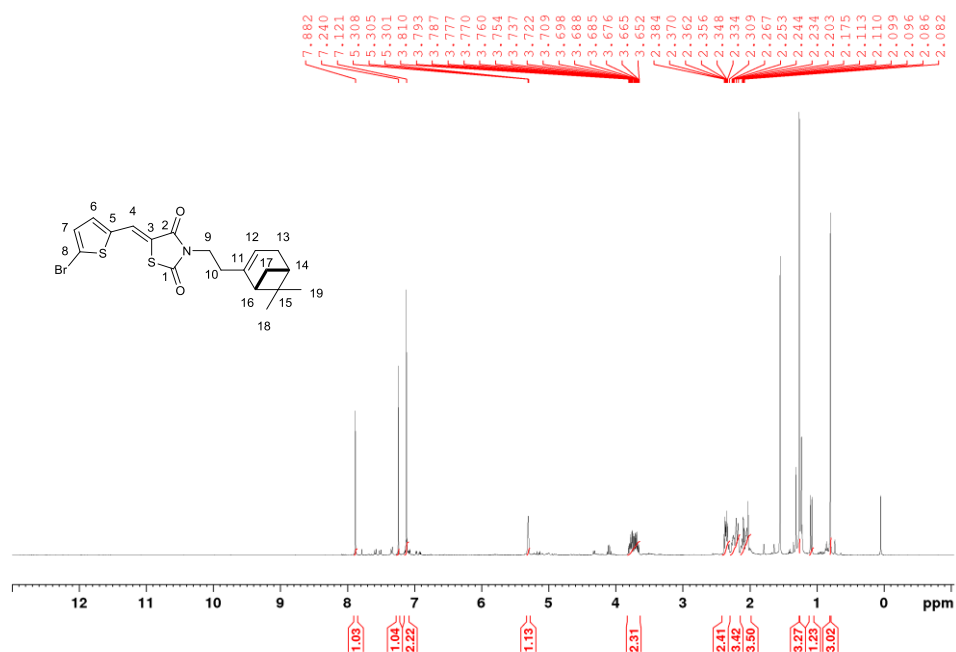

**Figure S13.** The  $^1\text{H}$  NMR spectrum of **21b**.

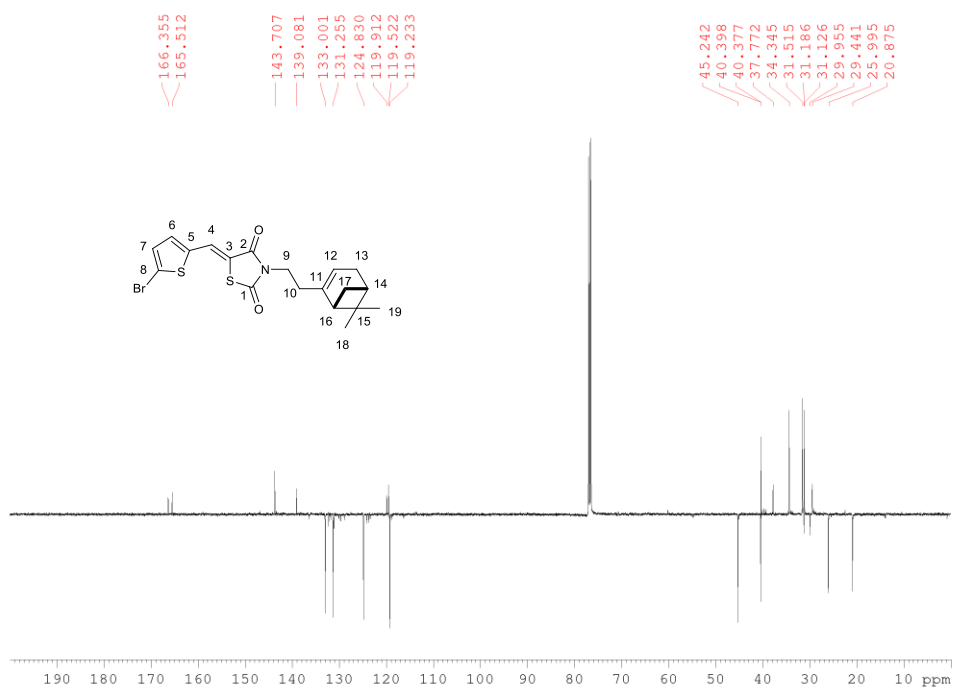

**Figure S14.** The  $^{13}\text{C}$  NMR spectrum of **21b**.



AA-479 #8 RT: 0.56 AV: 1 NL: 1.06E5  
T: + c EI Full ms [14.50-470.50]

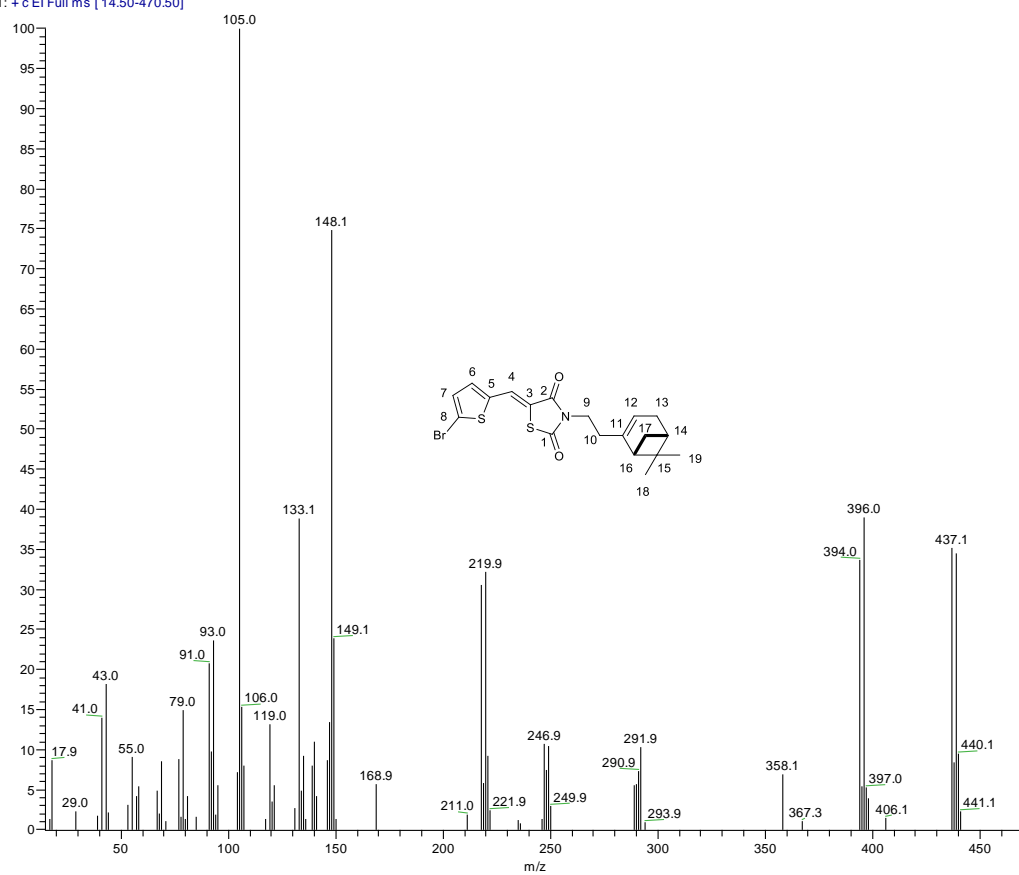

Figure S15. The DFS spectrum of 21b.

Compound 19c.

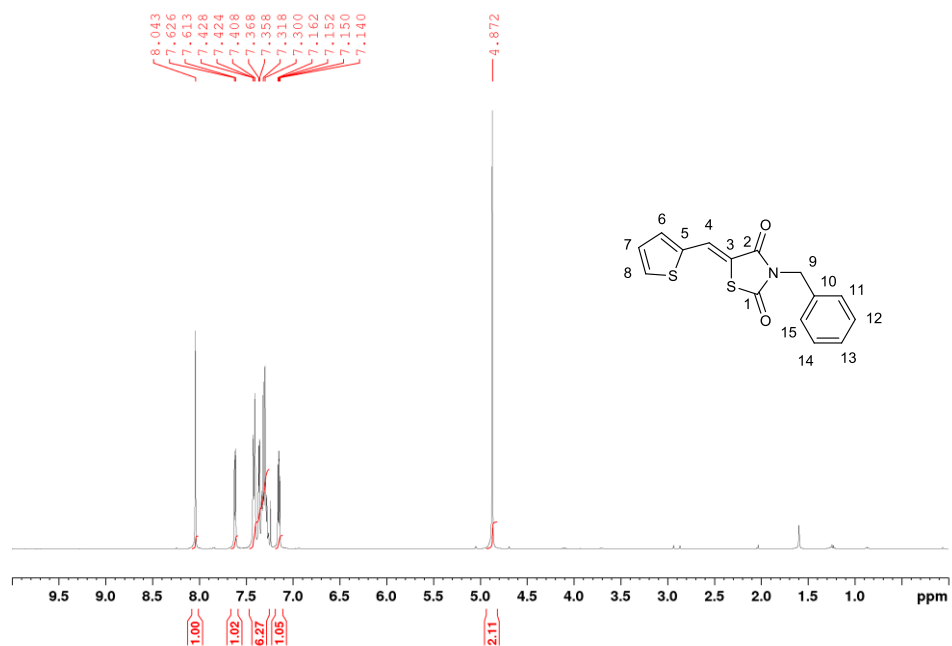

Figure S16. The <sup>1</sup>H NMR spectrum of 19c.

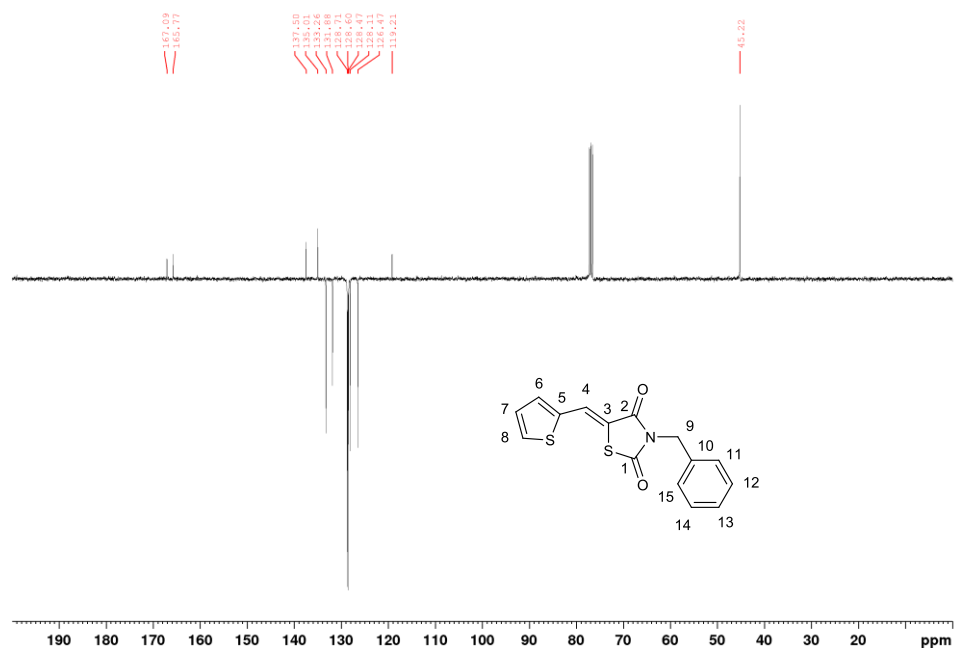

**Figure S17.** The  $^{13}\text{C}$  NMR spectrum of **19c**.

AA-398 #2 RT: 0.08 AV: 1 NL: 7.11E5  
T: + c EI Full ms [ 14.50-340.50]

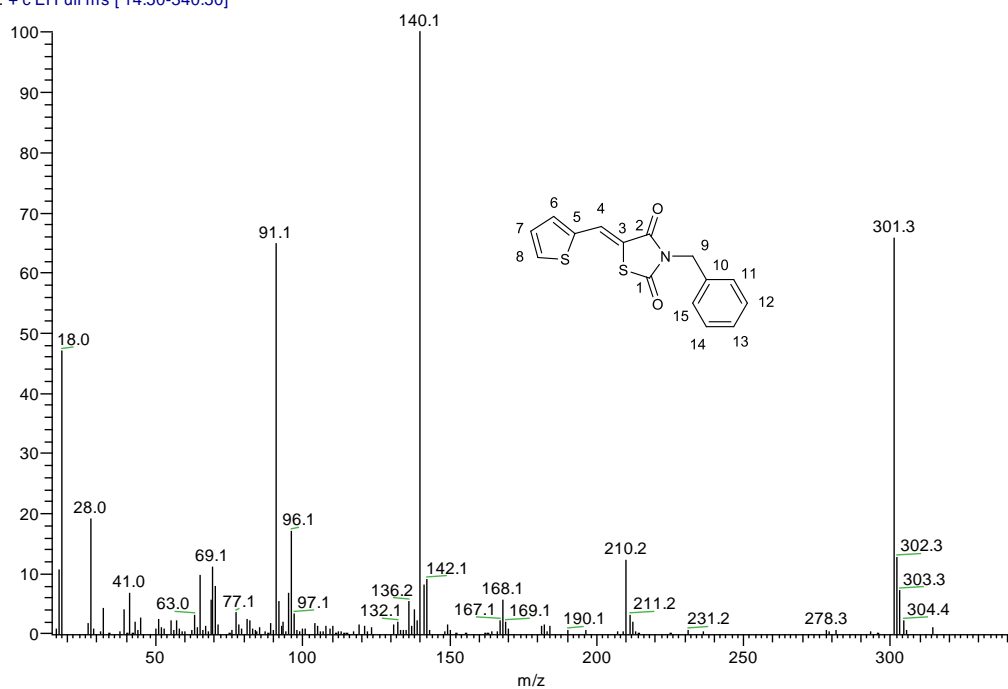

**Figure S18.** The DFS spectrum of **19c**.

Compound **20c**.

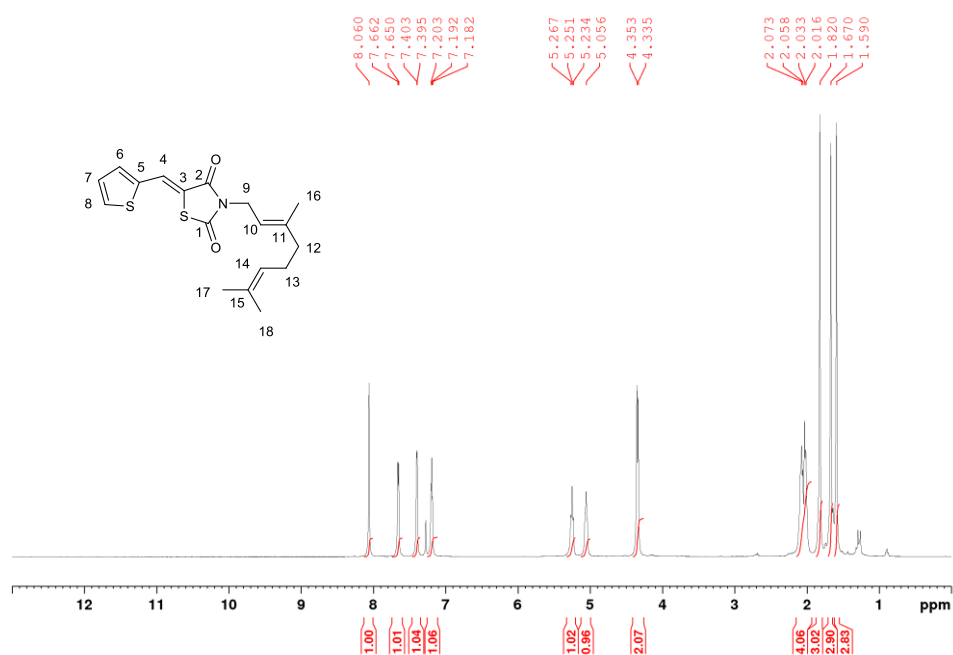

Figure S19. The <sup>1</sup>H NMR spectrum of **20c**.

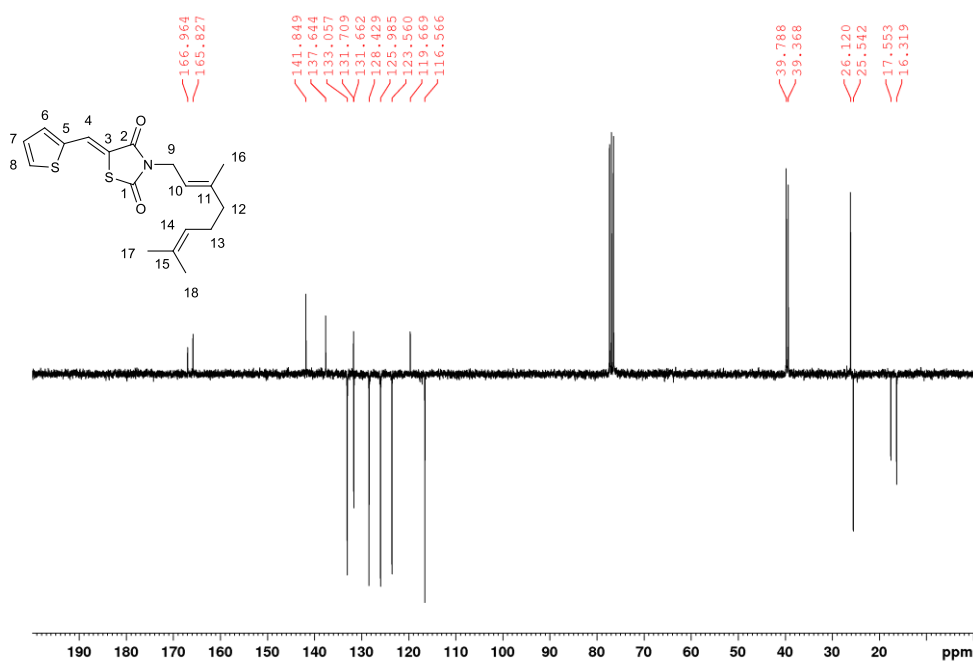

Figure S20. The <sup>13</sup>C NMR spectrum of **20c**.

AA-399 #35 RT: 2.57 AV: 1 NL: 8.31E6  
T: + c EI Full ms [14.50-380.50]

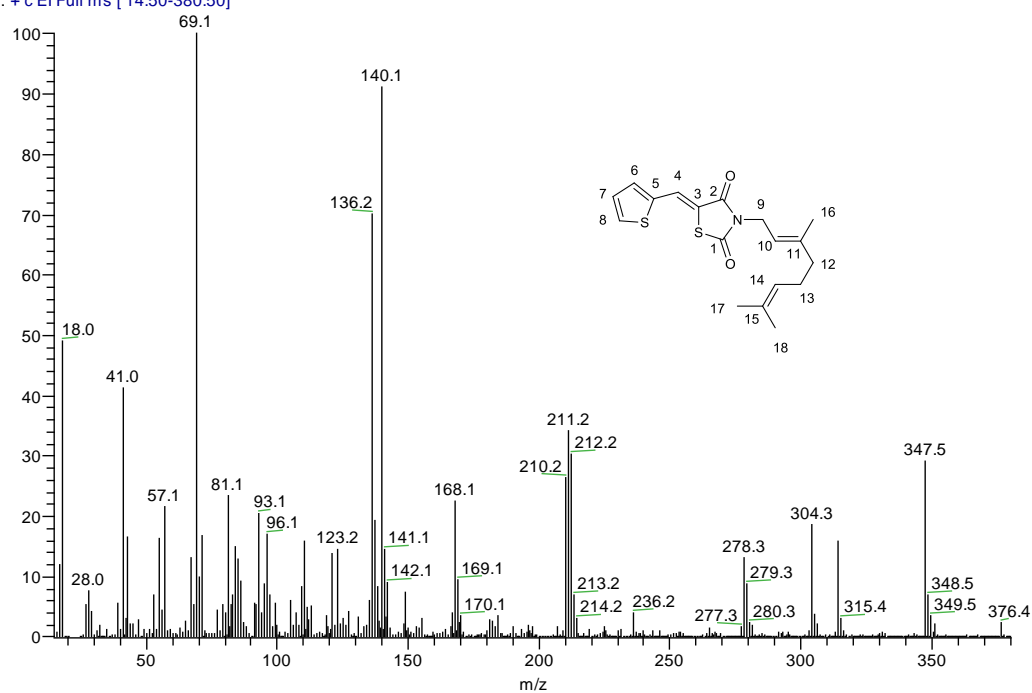

Figure S21. The DFS spectrum of 20c.

Compound 21c.

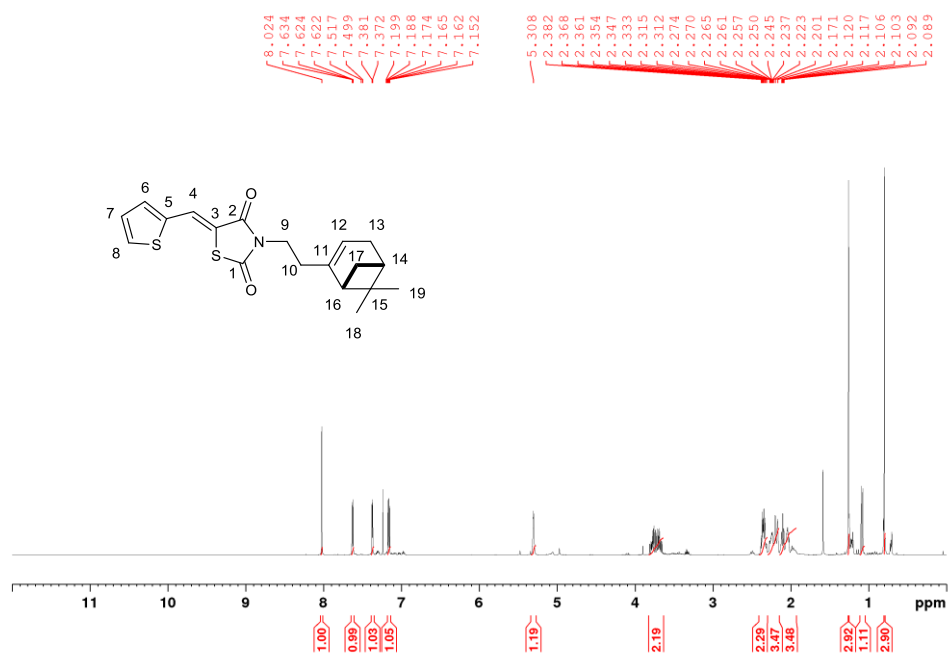

Figure S22. The <sup>1</sup>H NMR spectrum of 21c.

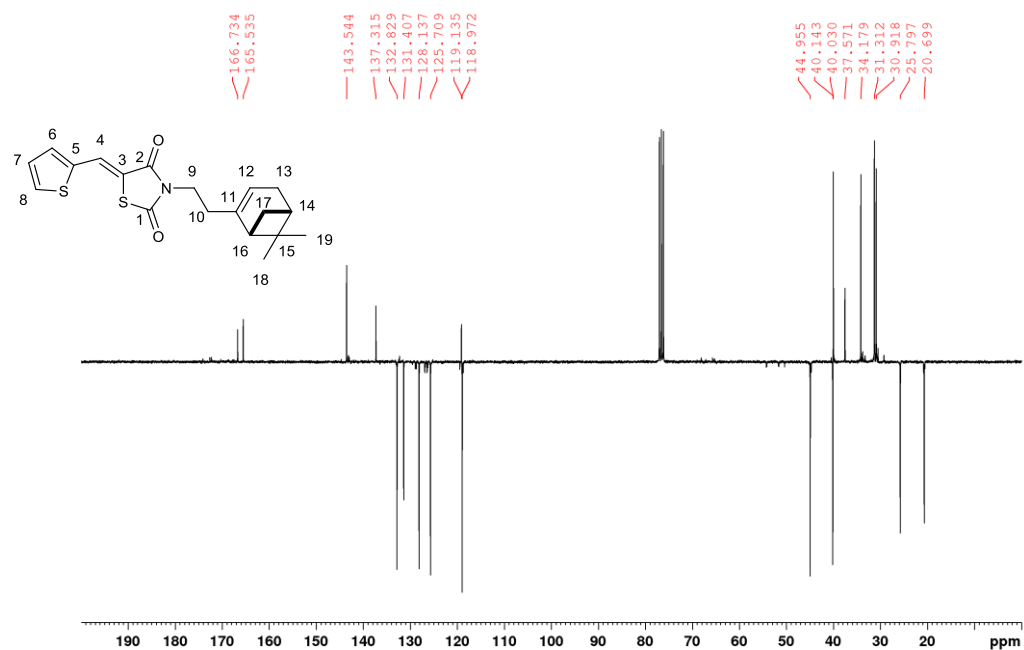

**Figure S23.** The  $^{13}\text{C}$  NMR spectrum of **21c**.

AA-400 #8 RT: 0.20 AV: 1 NL: 2.79E6  
T: + c EI Full ms [ 14.50-400.50]

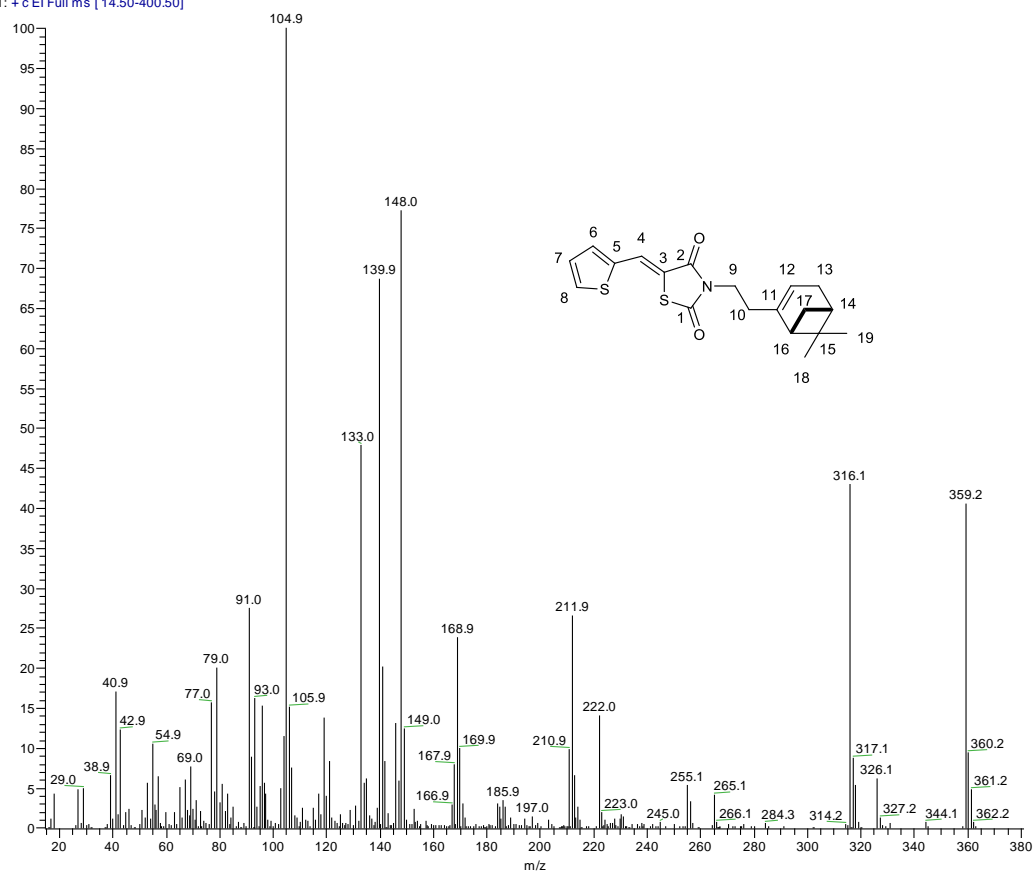

**Figure S24.** The DFS spectrum of **21c**.

Compound **19d**.

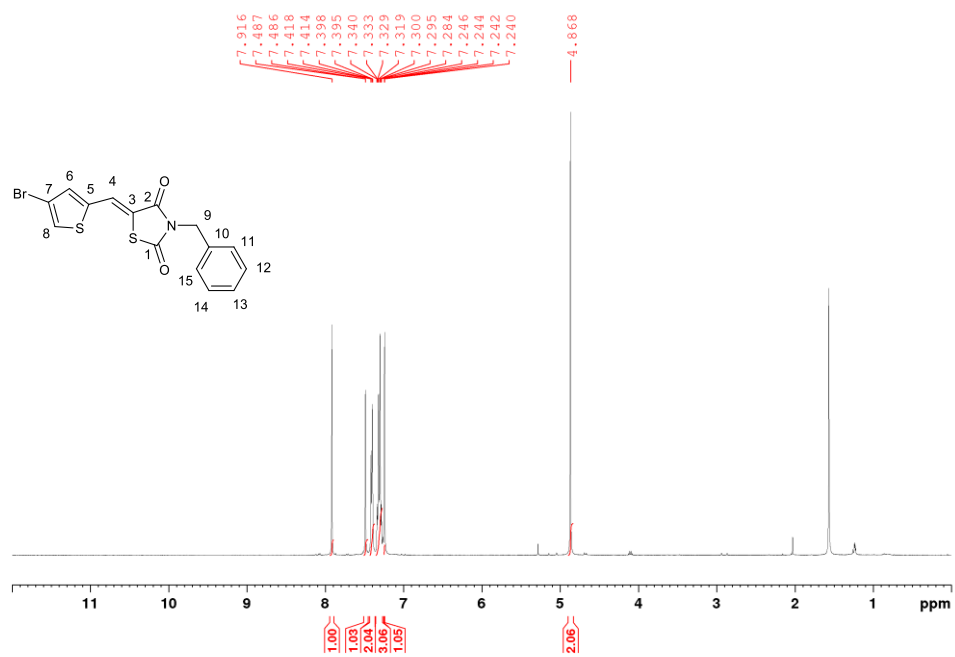

Figure S25. The <sup>1</sup>H NMR spectrum of **19d**.

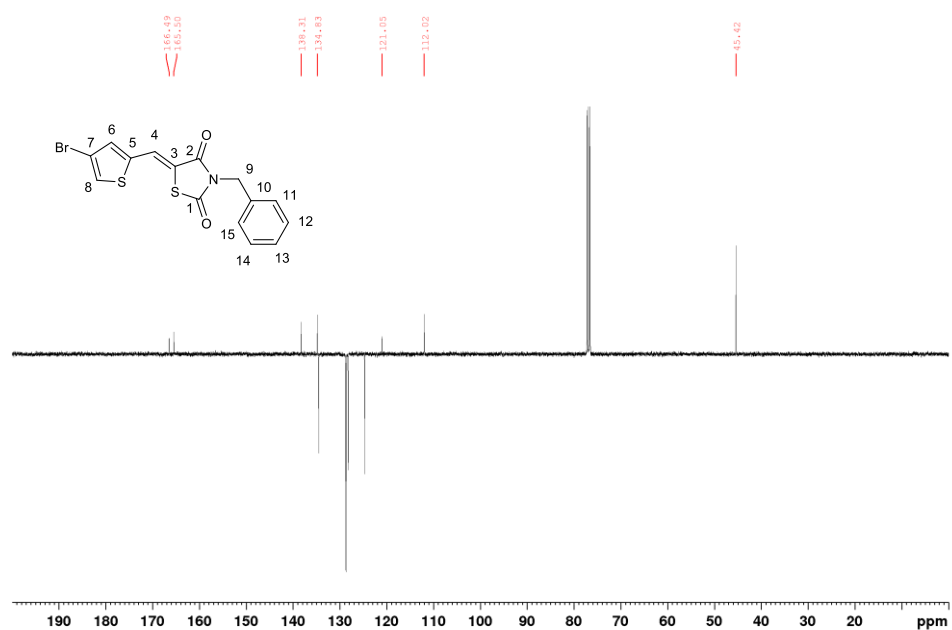

Figure S26. The <sup>13</sup>C NMR spectrum of **19d**.

AA-405 #8 RT: 0.54 AV: 1 NL: 2.16E7  
T: + c EI Full ms [32.50-400.50]

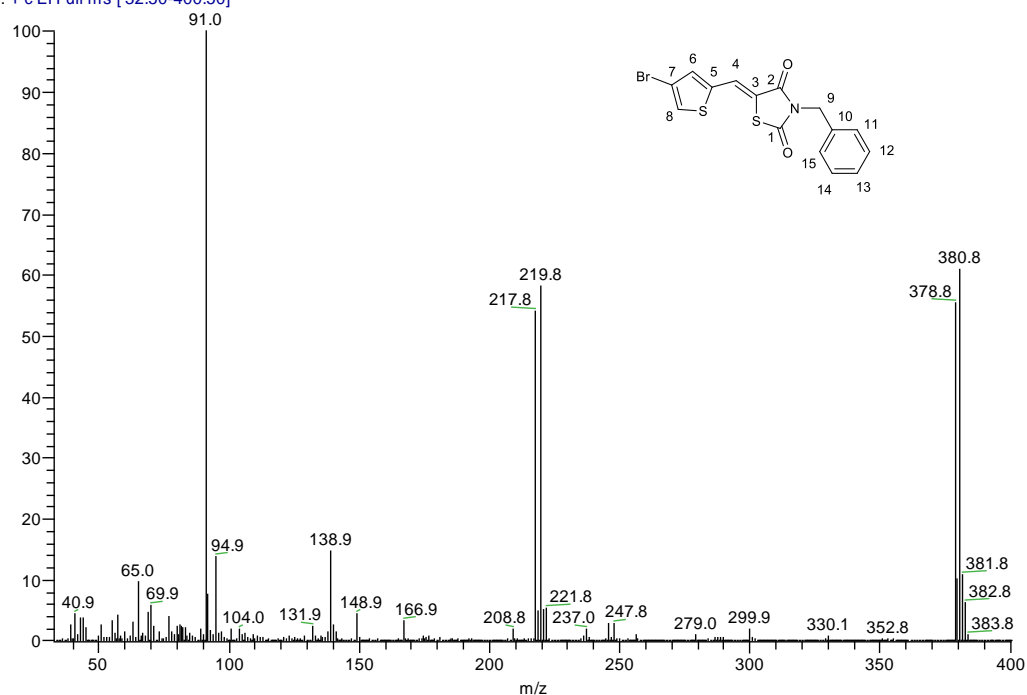

Figure S27. The DFS spectrum of 19d.

Compound 20d.

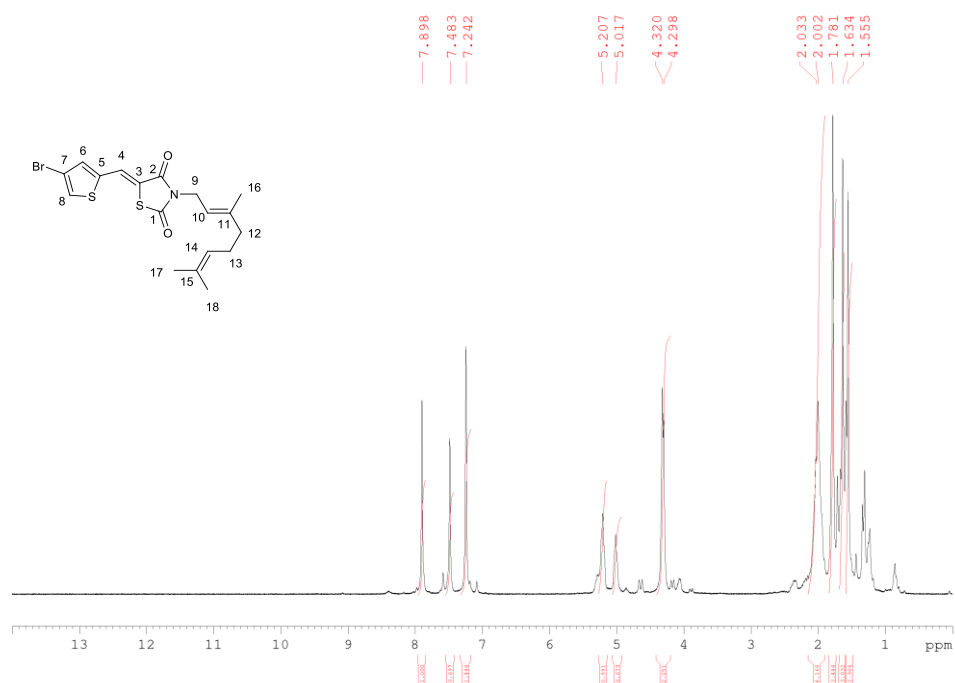

Figure S28. The <sup>1</sup>H NMR spectrum of 20d.

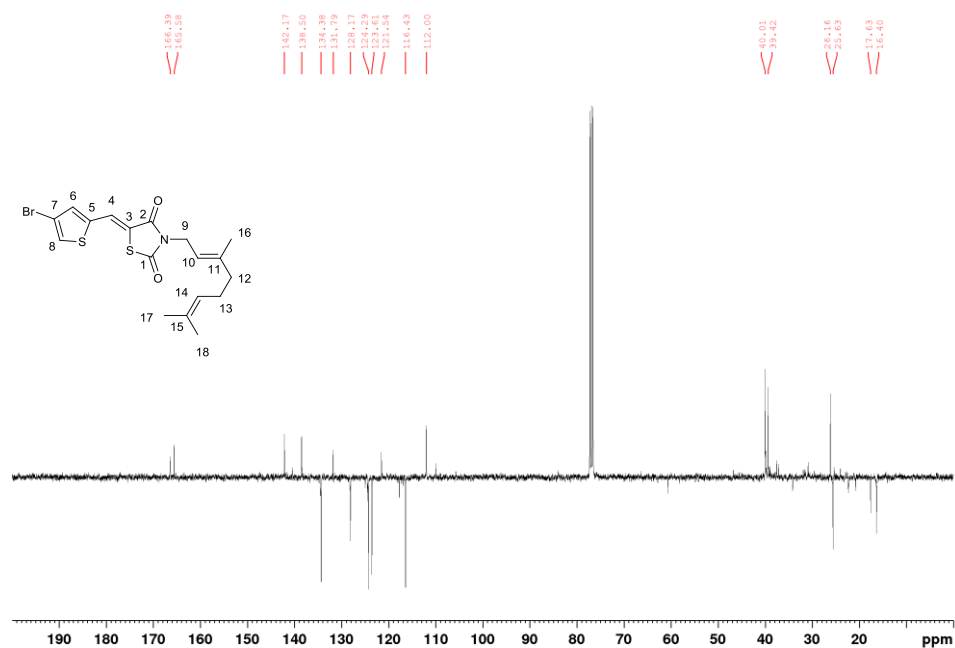

**Figure S29.** The  $^{13}\text{C}$  NMR spectrum of 20d.

AA-423 #8 RT: 0.47 AV: 1 NL: 3.75E6  
T: +c EI Full ms [ 32.50-460.50]

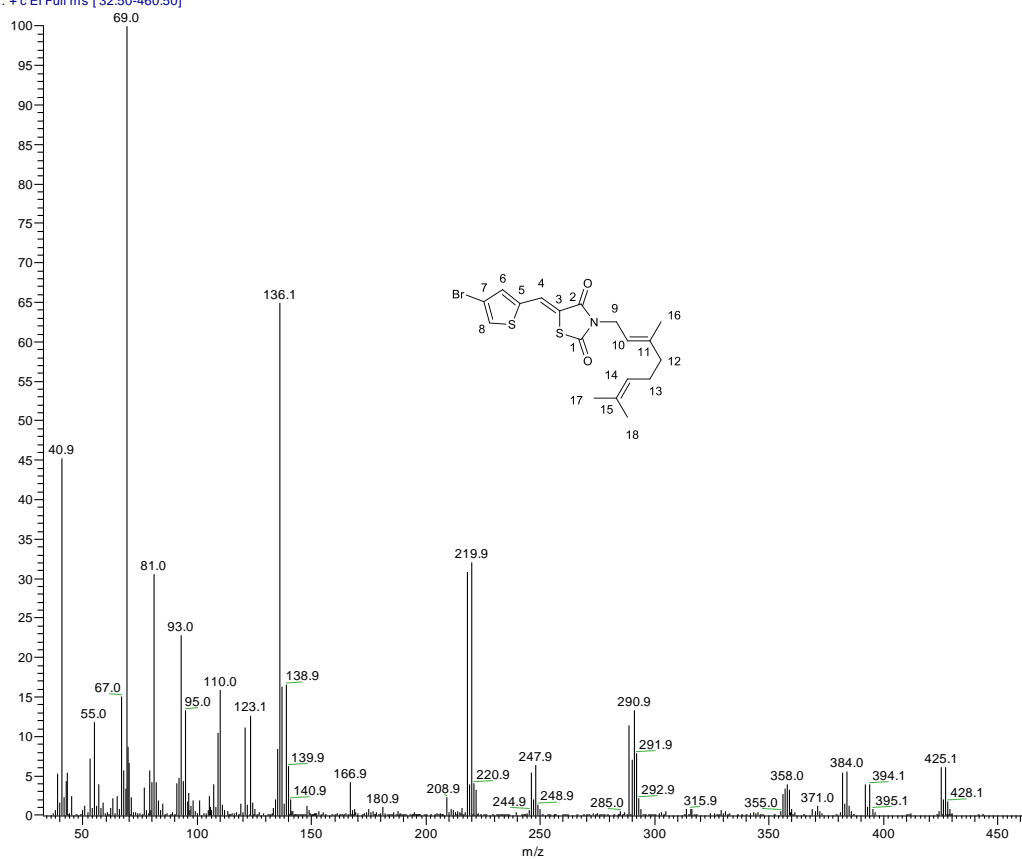

**Figure S30.** The DFS spectrum of 20d.



Compound **21d**.

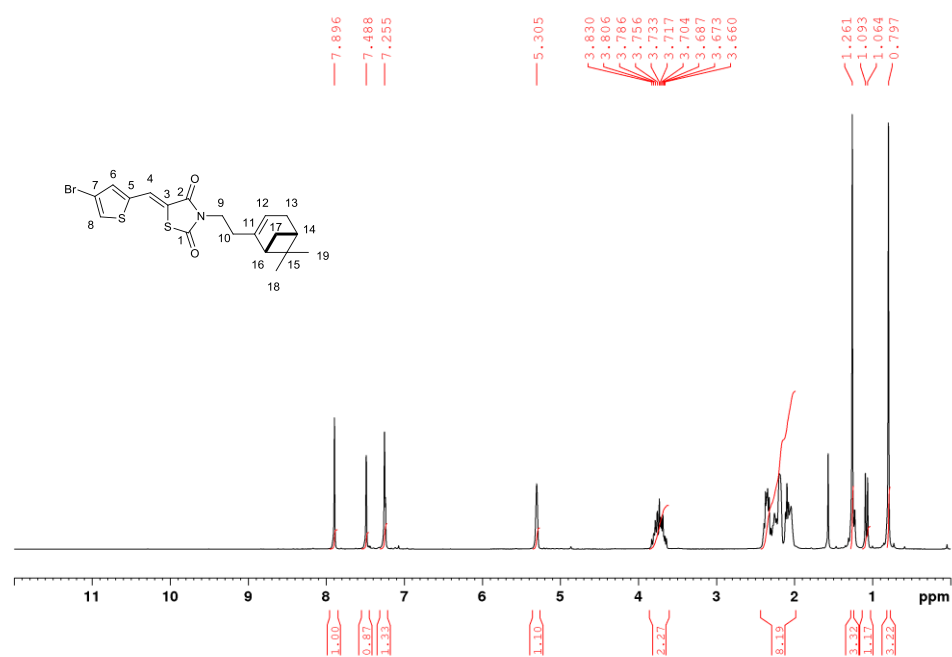

Figure S31. The  $^1\text{H}$  NMR spectrum of **21d**.

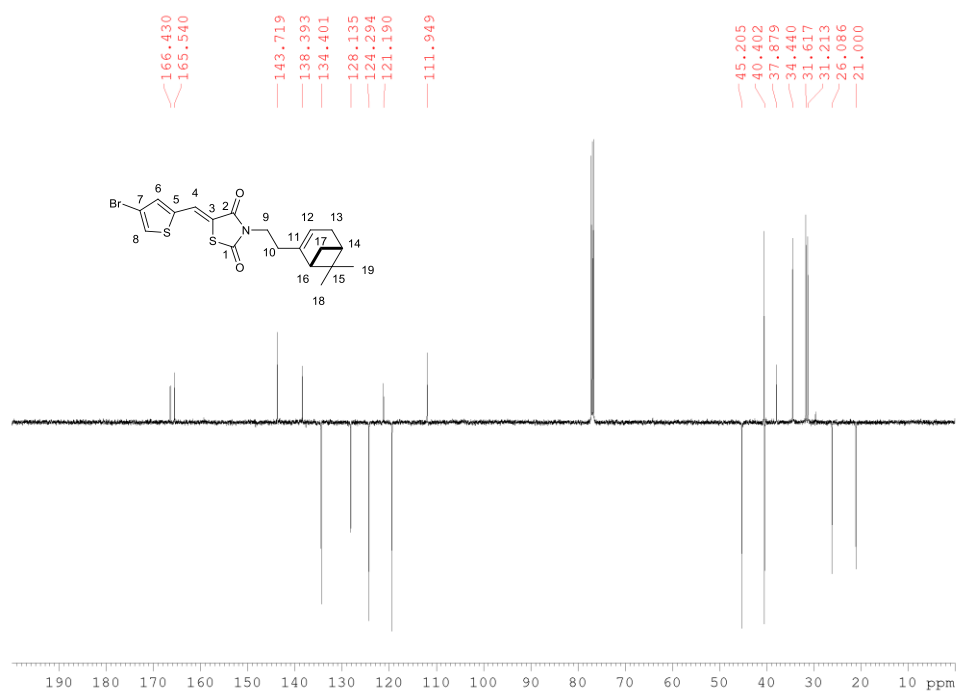

Figure S32. The  $^{13}\text{C}$  NMR spectrum of **21d**.

AA-424 #8 RT: 0.55 AV: 1 NL: 4.09E6  
T: + c EI Full ms [14.50-450.50]

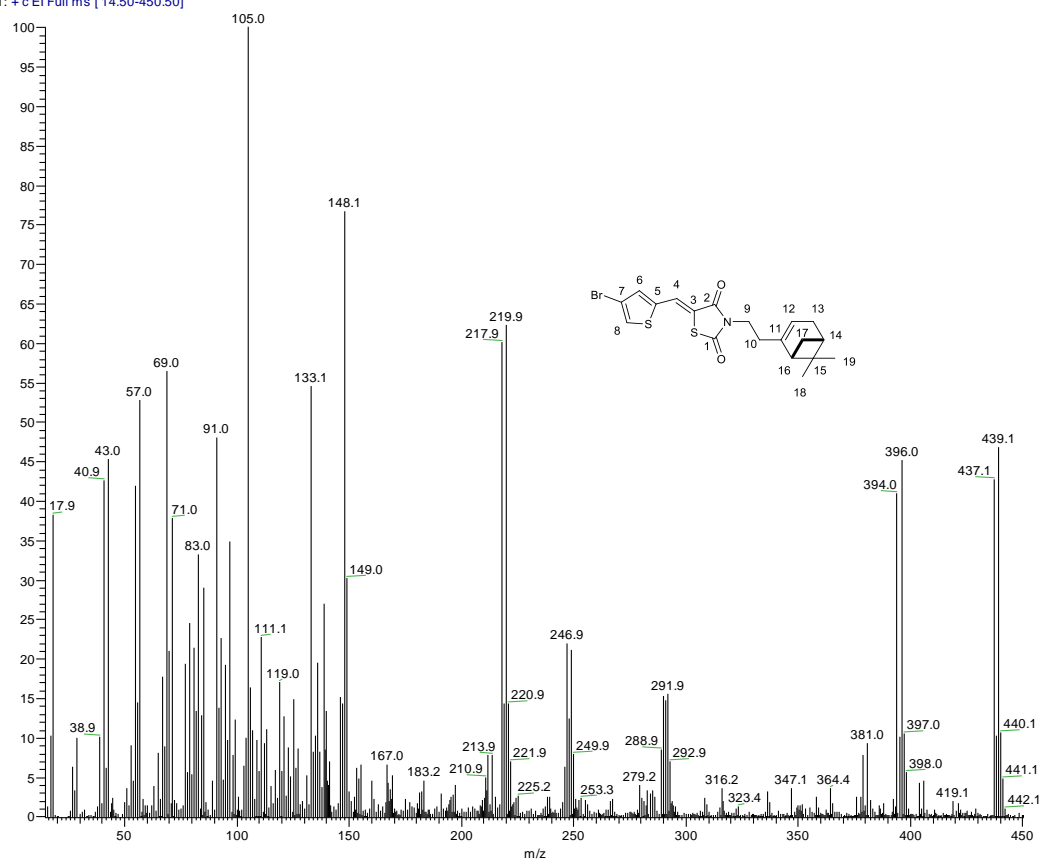

Figure S33. The DFS spectrum of 21d.

Compound 19e.

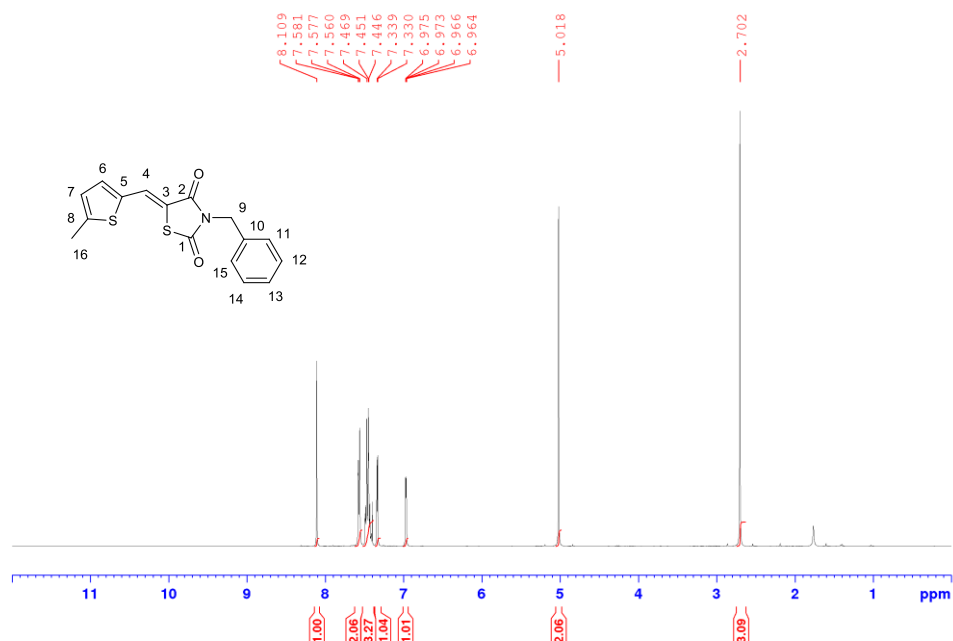

Figure S34. The <sup>1</sup>H NMR spectrum of 19e.

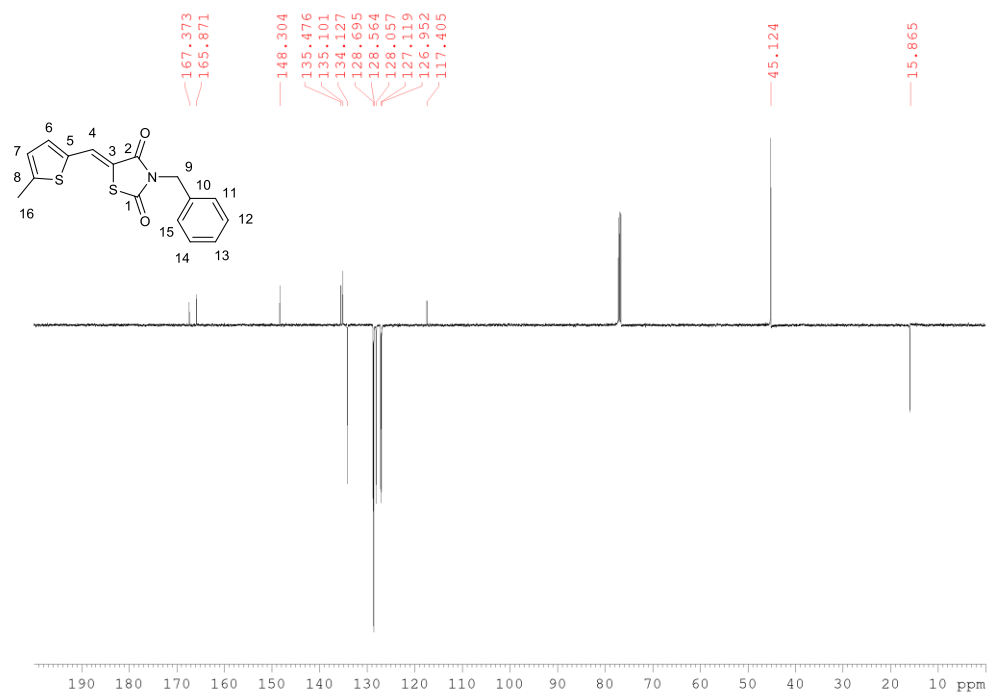

**Figure S35.** The  $^{13}\text{C}$  NMR spectrum of **19e**.

AA-406 #3 RT: 0.12 AV: 1 NL: 7.92E5  
T: + c EI Full ms [ 32.50-380.50]

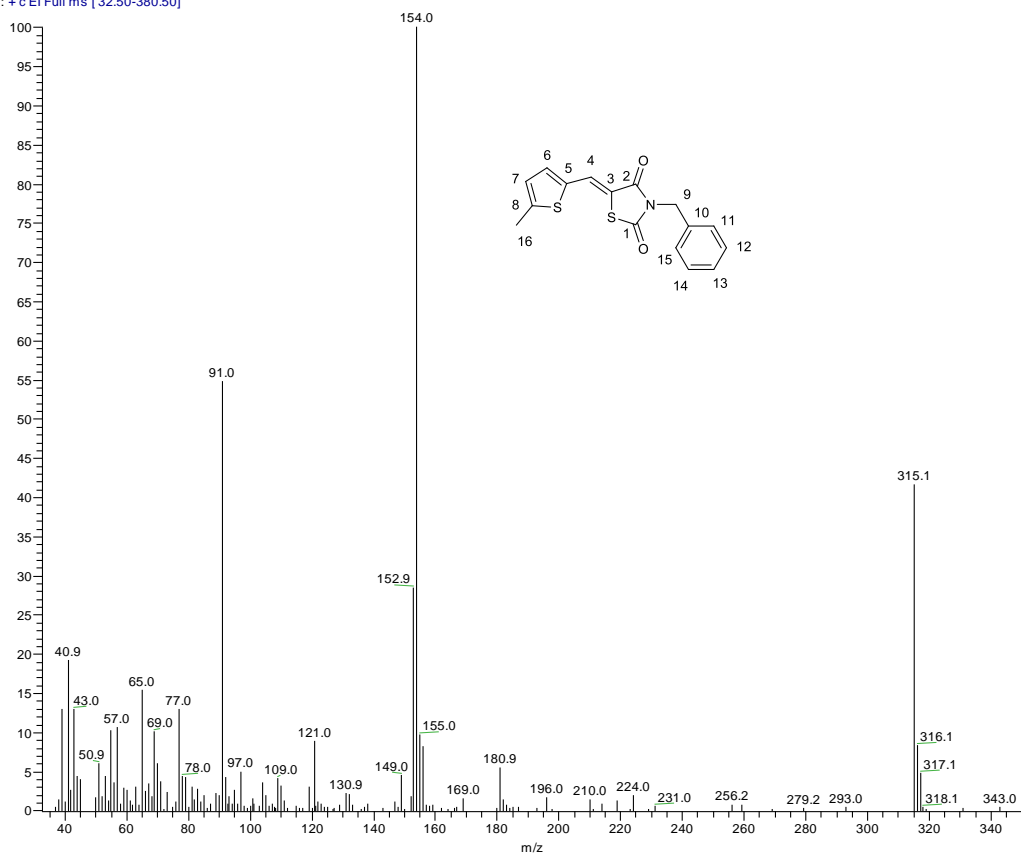

**Figure S36.** The DFS spectrum of **19e**.

Compound **20e**.

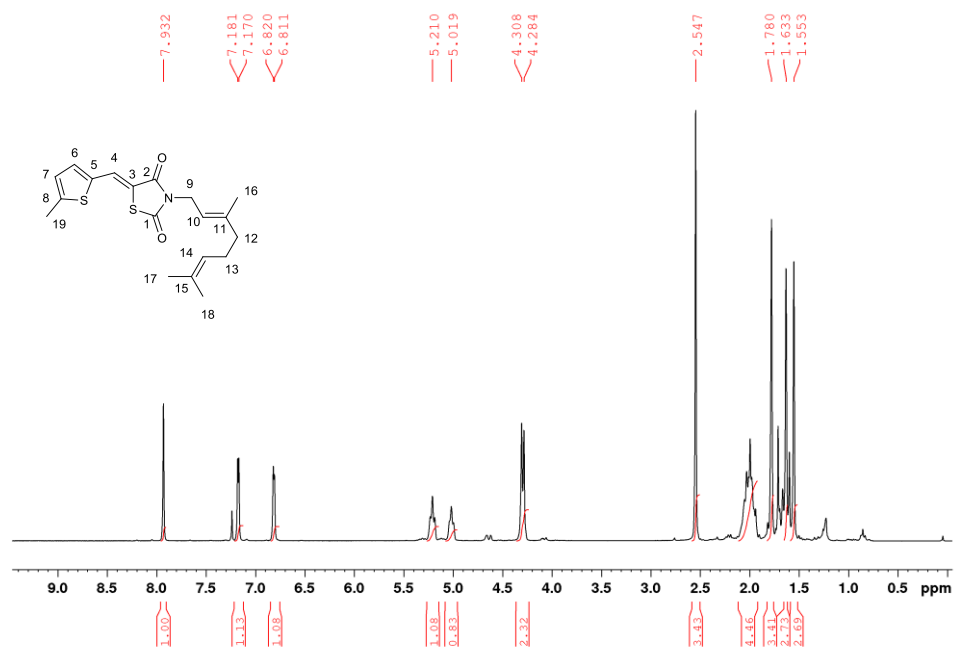

Figure S37. The <sup>1</sup>H NMR spectrum of **20e**.

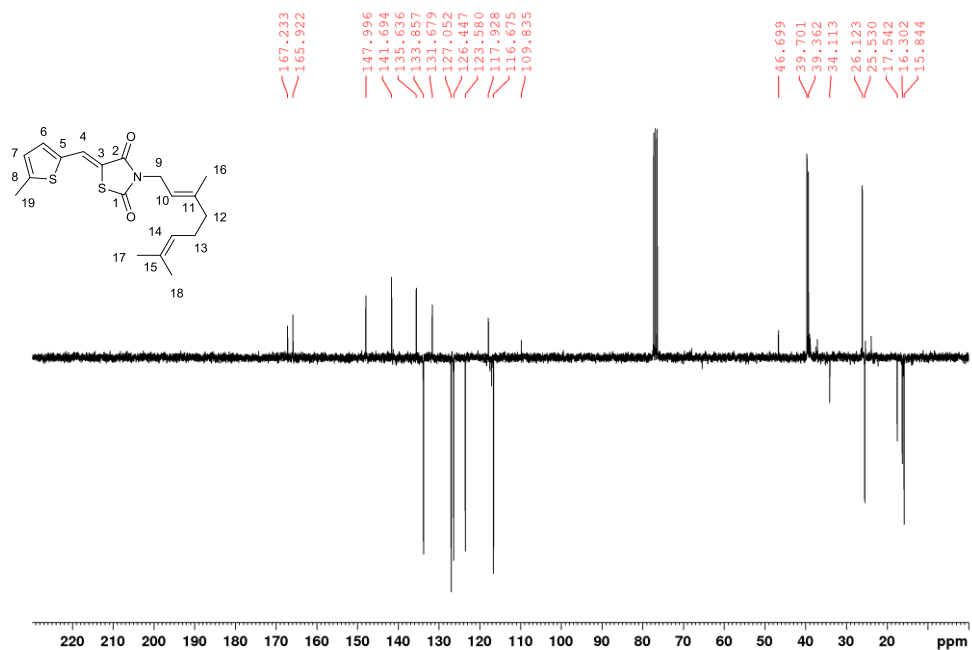

Figure S38. The <sup>13</sup>C NMR spectrum of **20e**.

AA-409 #3 RT: 0.16 AV: 1 NL: 1.60E7  
T: + c EI Full ms [14.50-400.50]

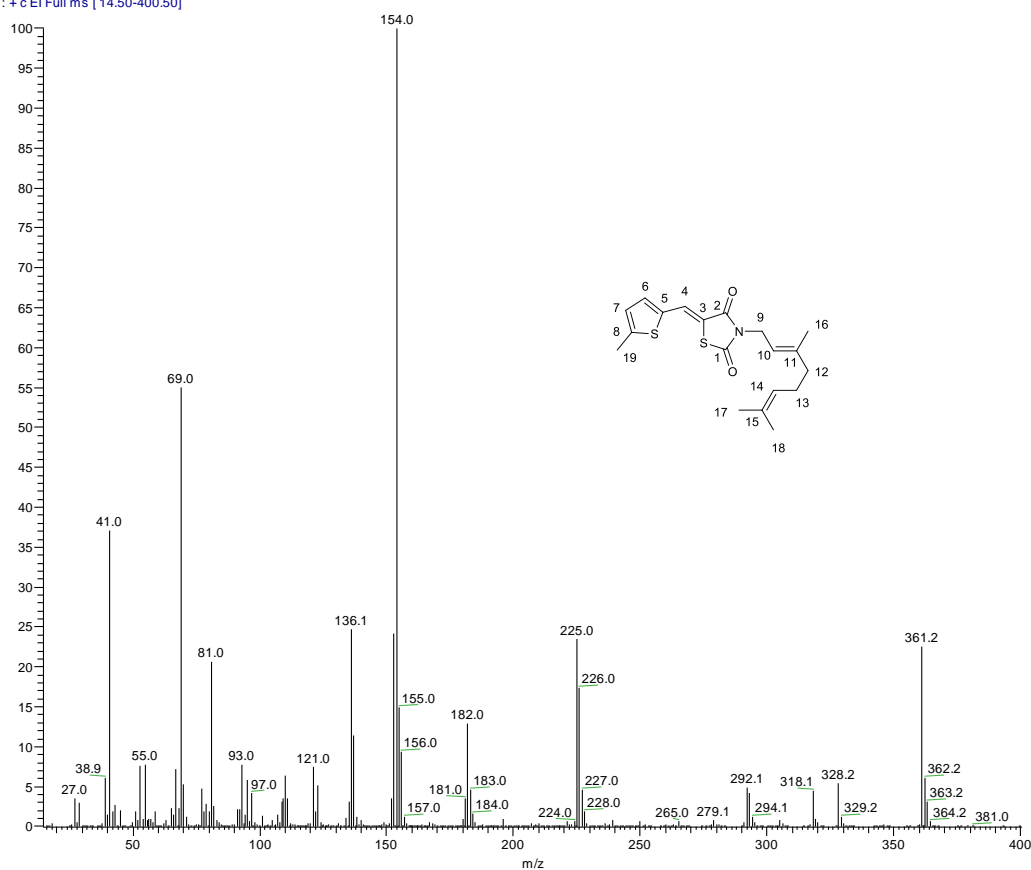

Figure S39. The DFS spectrum of 20e.

Compound 21e.

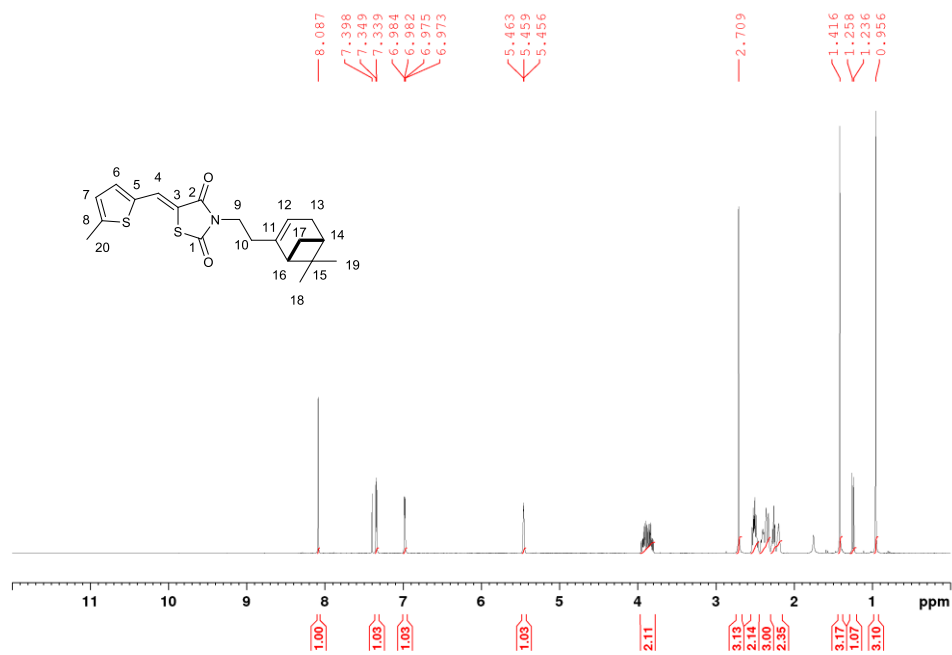

Figure S40. The <sup>1</sup>H NMR spectrum of 21e.

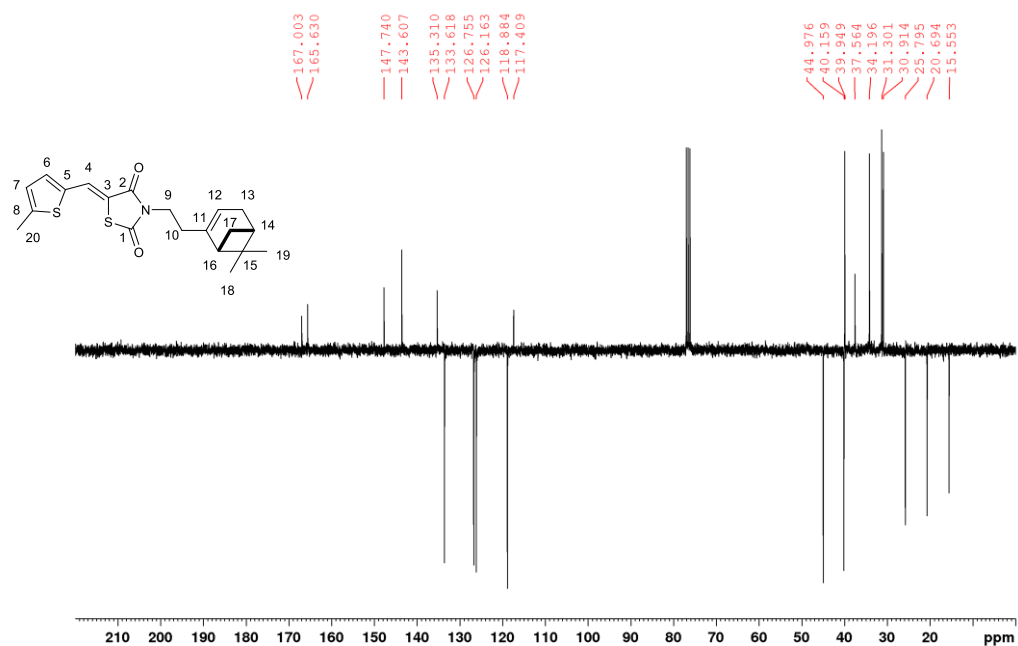

Figure S41. The  $^{13}\text{C}$  NMR spectrum of 21e.

AA-410 #15 RT: 0.93 AV: 1 NL: 4.63E6  
T: + c EI Full ms [ 32.50-400.50]

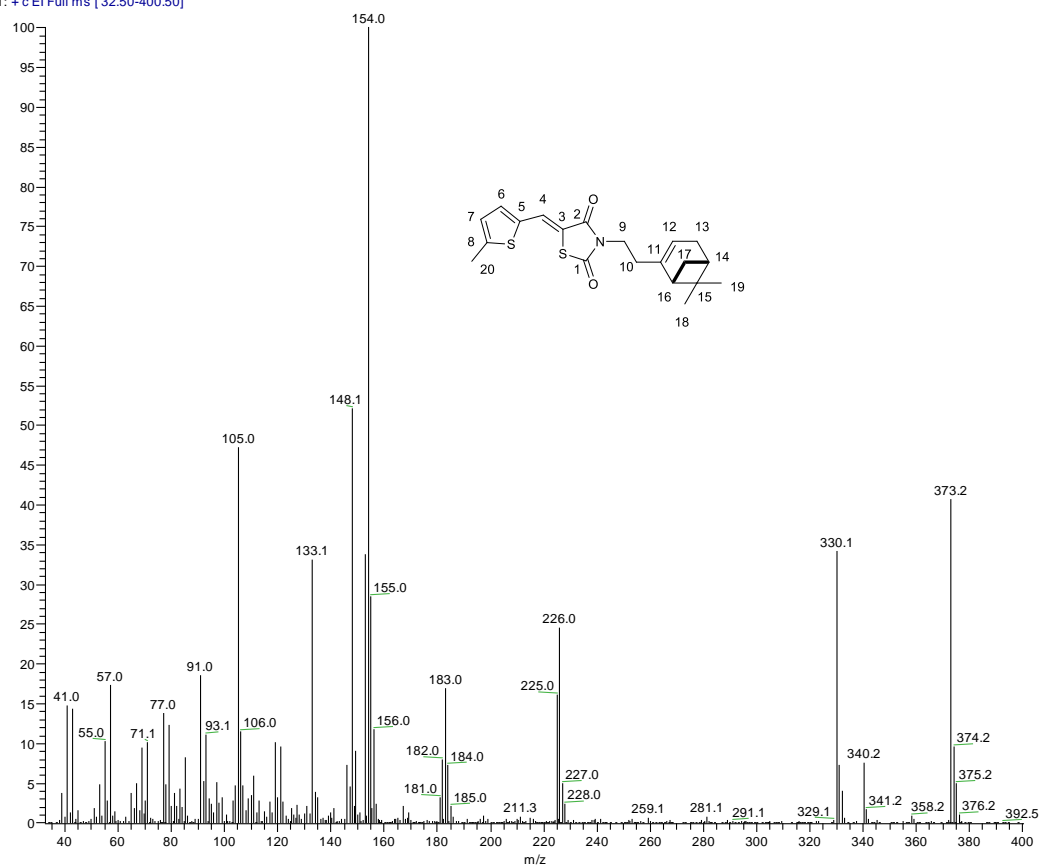

Figure S42. The DFS spectrum of 21e.

Compound **19f**.

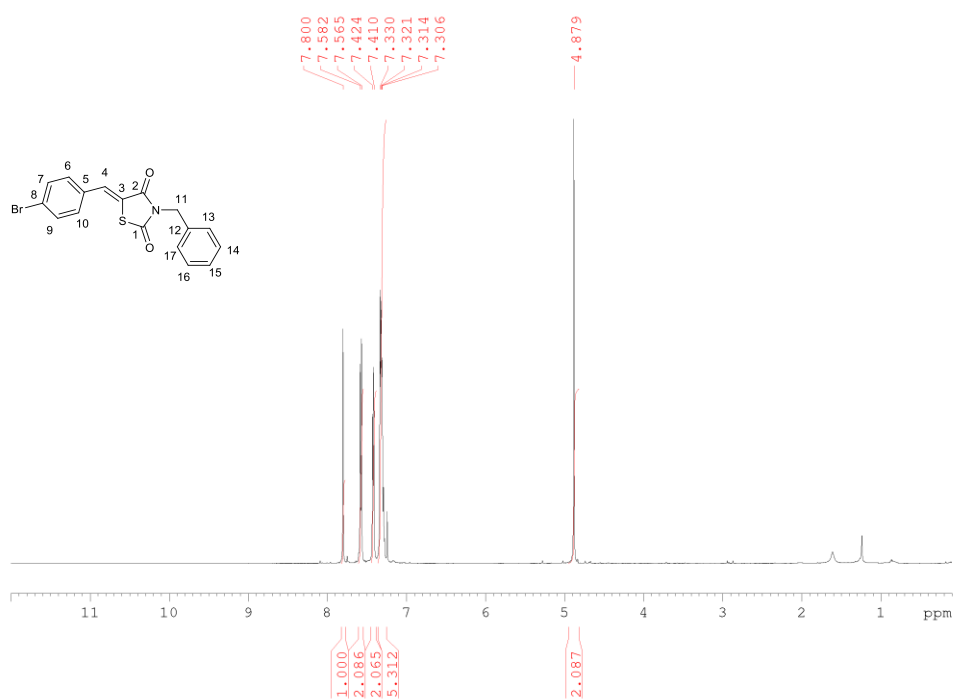

Figure S43. The  $^1\text{H}$  NMR spectrum of **19f**.

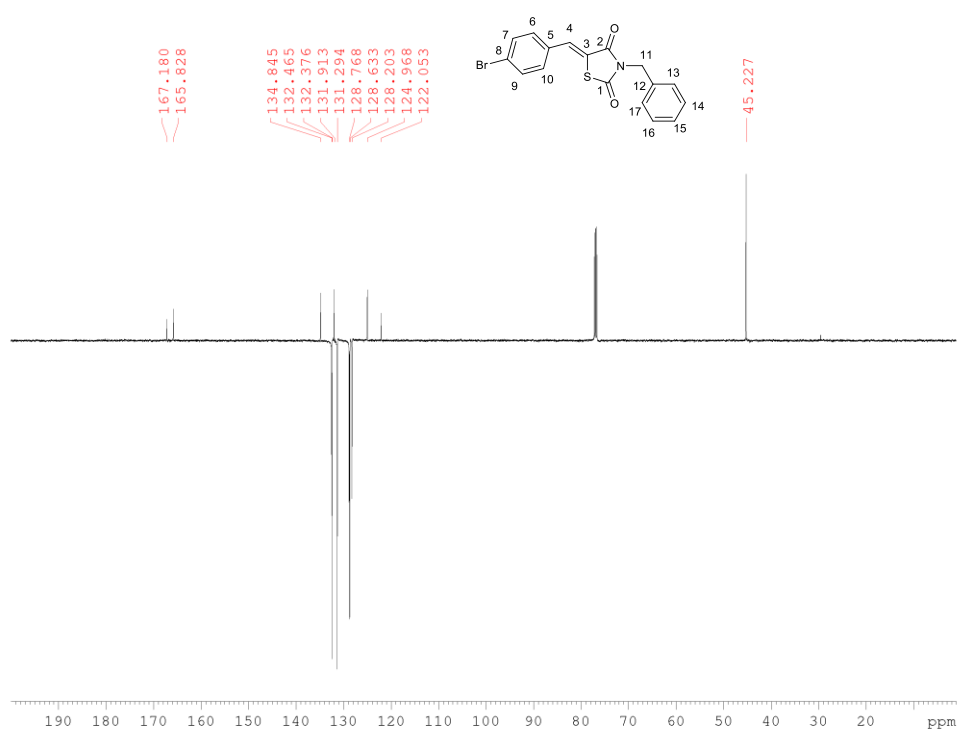

Figure S44. The  $^{13}\text{C}$  NMR spectrum of **19f**.

AA-357 #2 RT: 0.06 AV: 1 NL: 1.91E6  
T: + c EI Full ms [32.50-410.50]

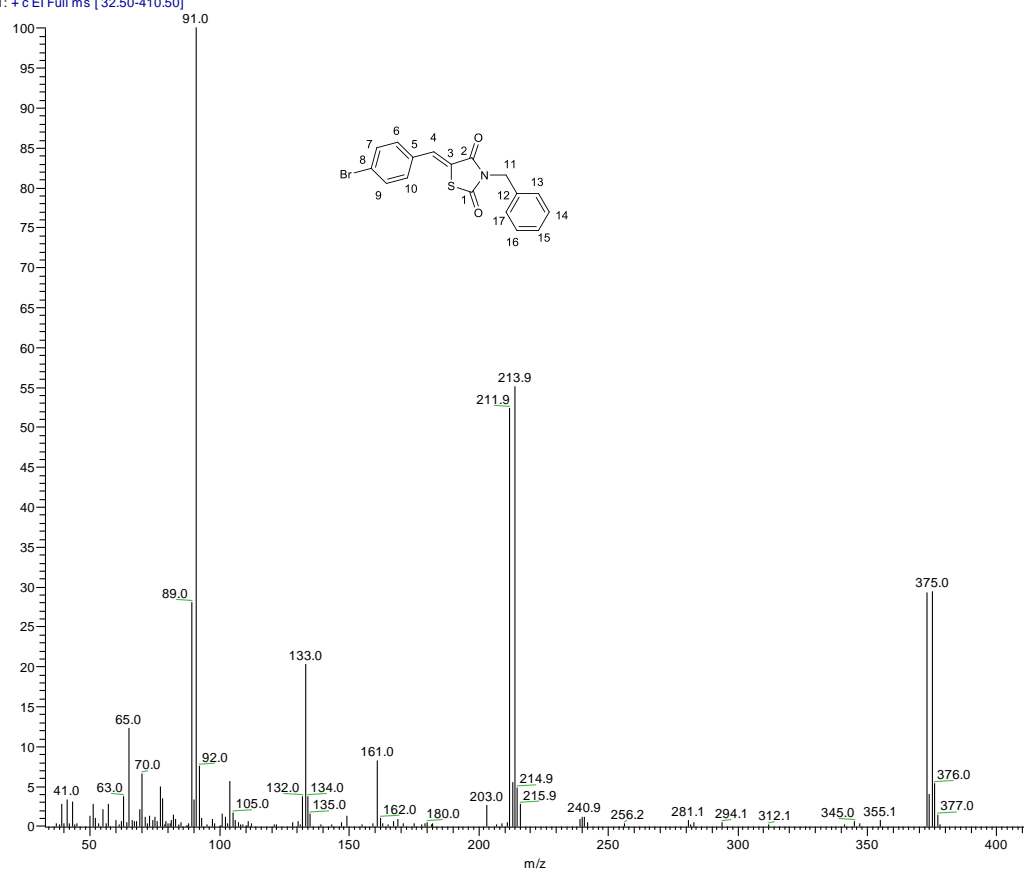

Figure S45. The DFS spectrum of 19f.

Compound 20f.

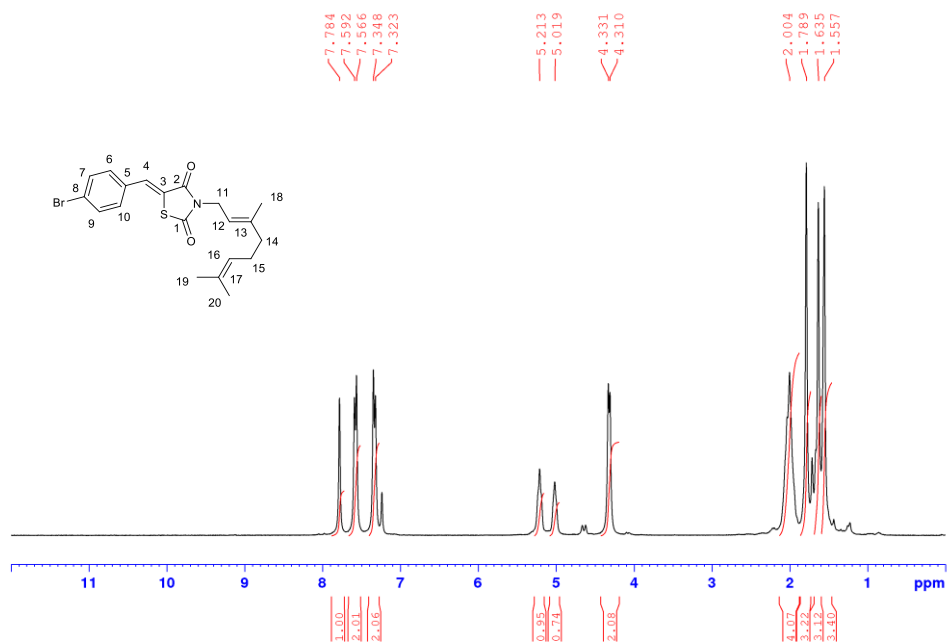

Figure S46. The  $^1\text{H}$  NMR spectrum of 20f.



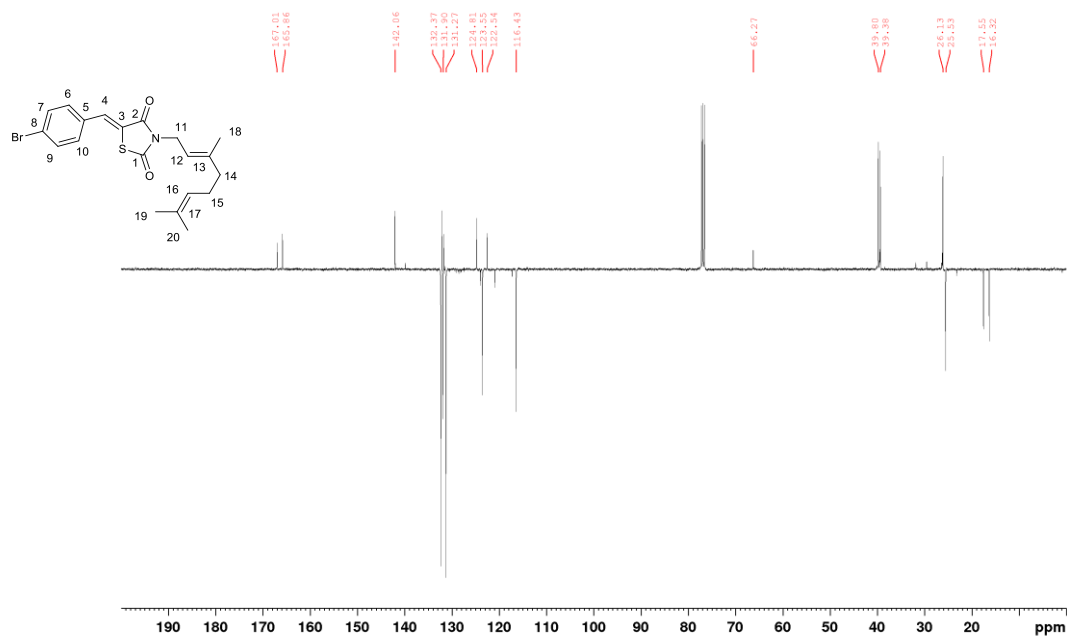

Figure S47. The  $^{13}\text{C}$  NMR spectrum of 20f.

AA-358\_#14 RT: 0.80 AV: 1 NL: 1.16E7  
T: + c EI Full ms [ 32.50-450.50]

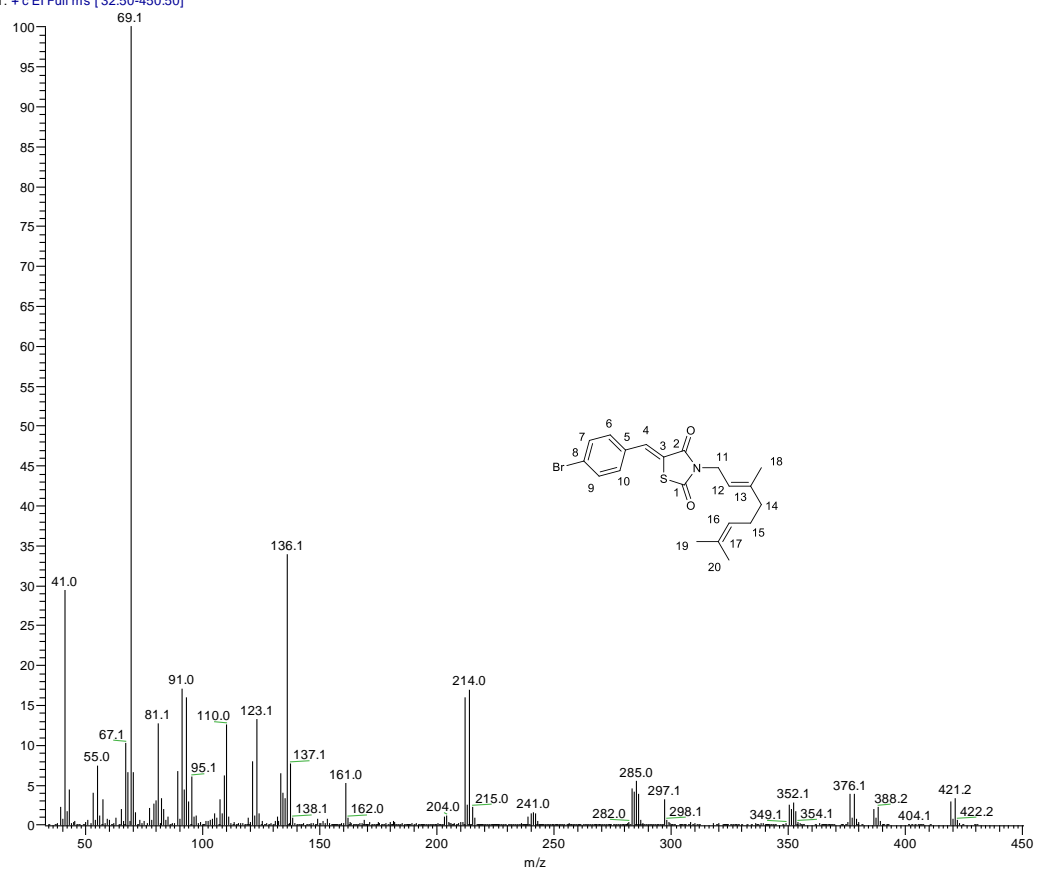

Figure S48. The DFS spectrum of 20f.

Compound **21f**.

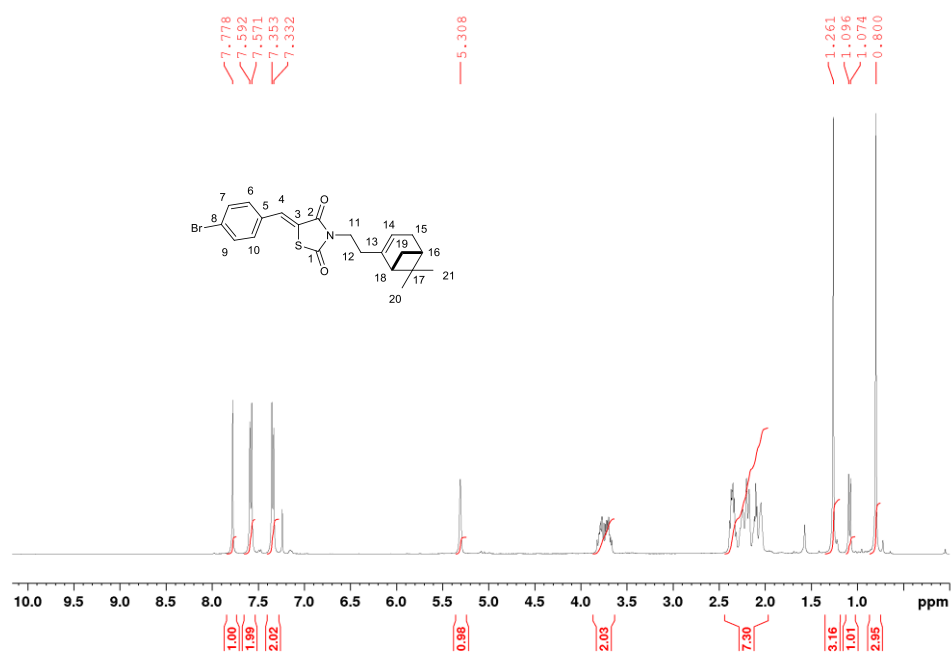

Figure S49. The  $^1\text{H}$  NMR spectrum of **21f**.

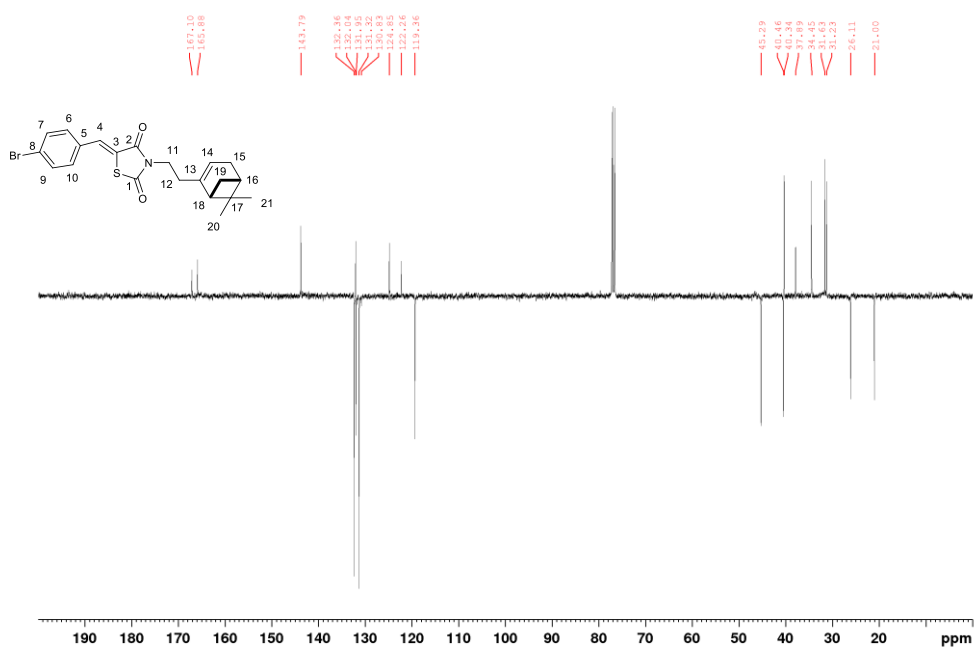

Figure S50. The  $^{13}\text{C}$  NMR spectrum of **21f**.

AA-395 #12 RT: 0.87 AV: 1 NL: 4.03E7  
T: + c EI Full ms [14.50-460.50]

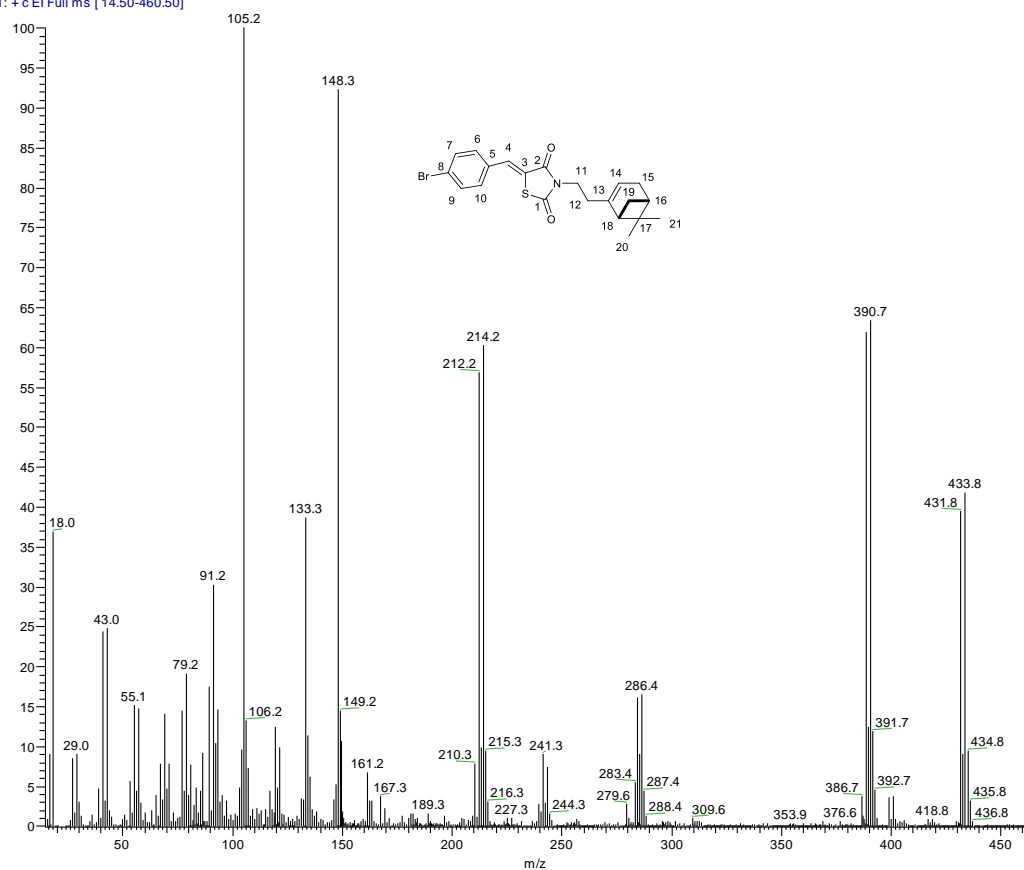

Figure S51. The DFS spectrum of 21f.

Compound 21g.

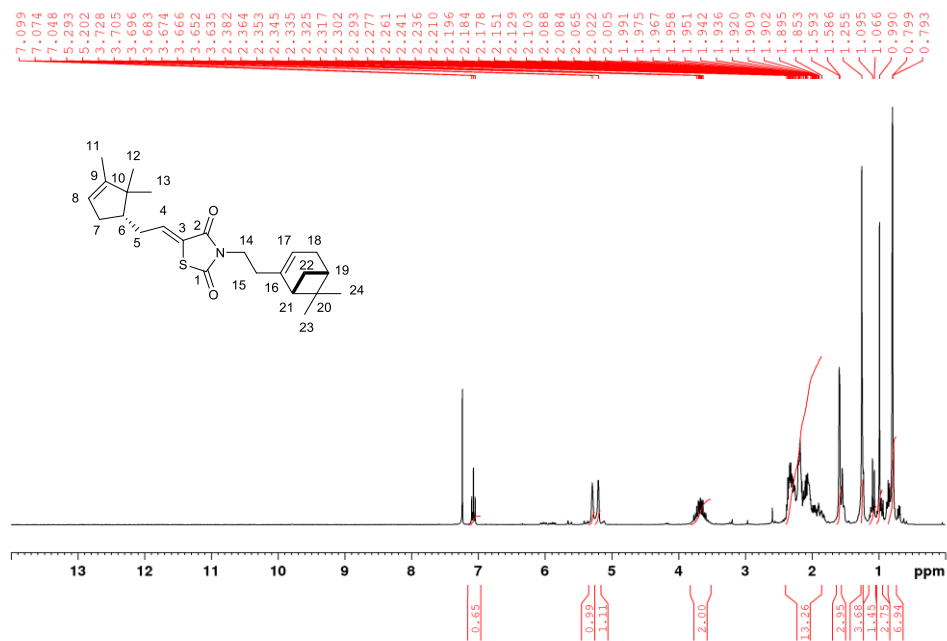

Figure S52. The  $^1\text{H}$  NMR spectrum of 21g.

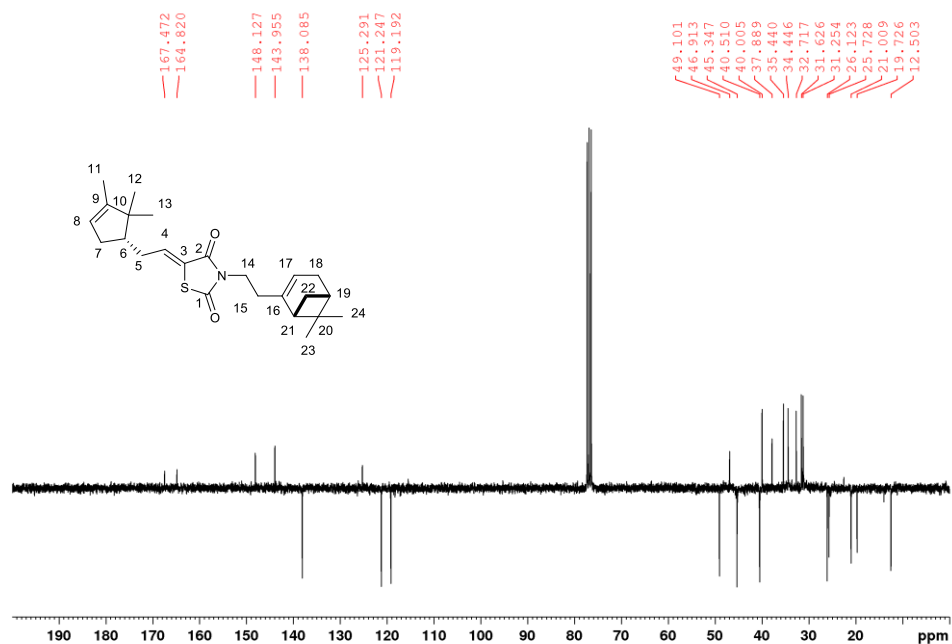

Figure S53. The  $^{13}\text{C}$  NMR spectrum of **21g**.

AA-89 #1 RT: 0.00 AV: 1 NL: 3.29E6  
T: + c EI Full ms [ 14.50-415.50]

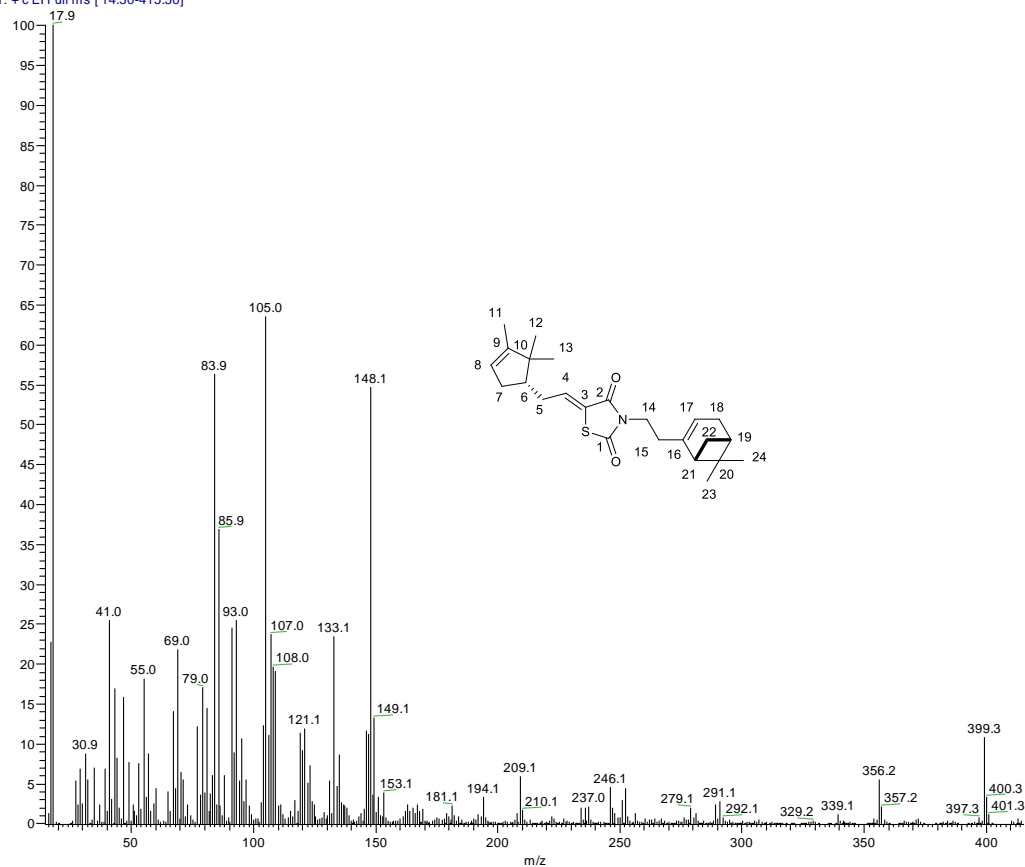

Figure S54. The DFS spectrum of **21g**.

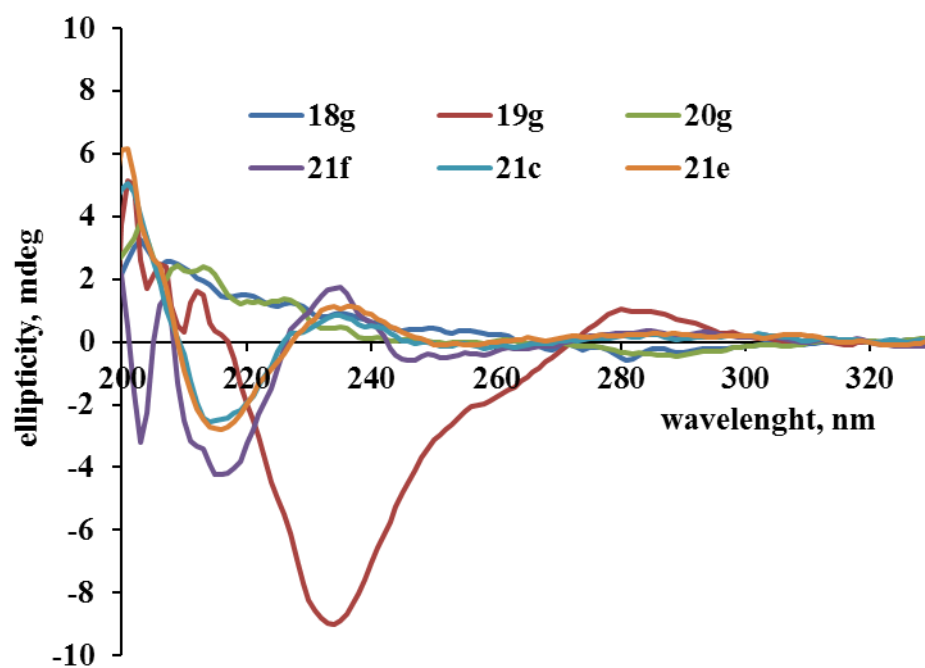

Figure S55. Circular dichroism spectroscopy experiments.

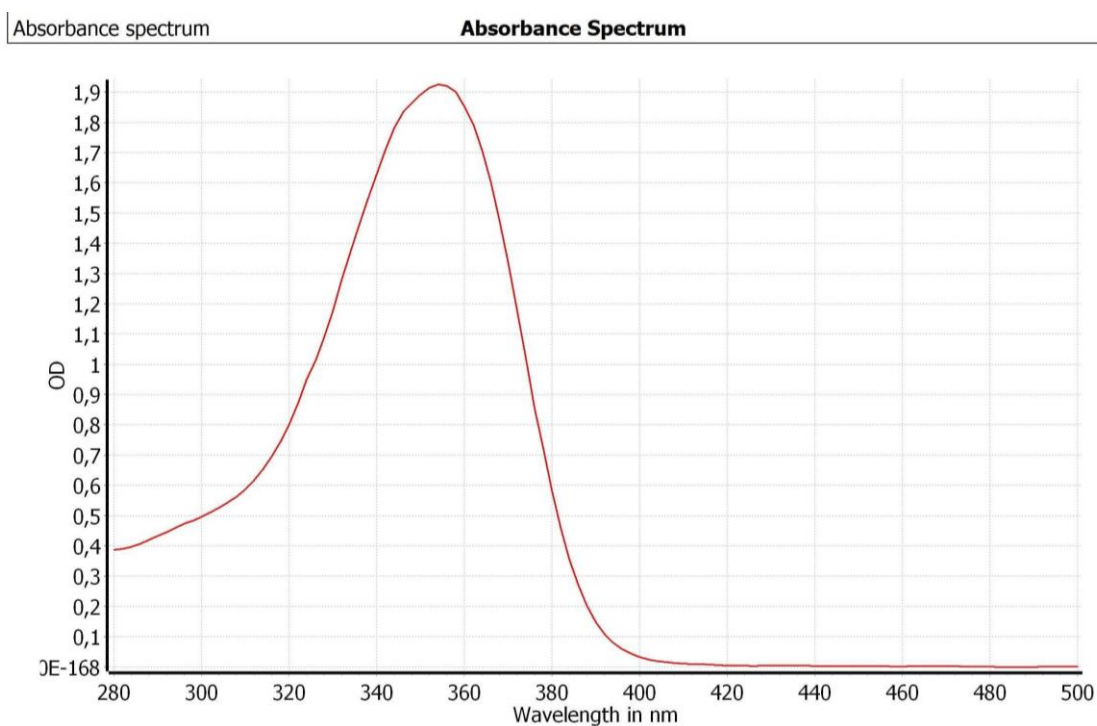

Figure S56. The UV-vis absorption spectrum of 18a.

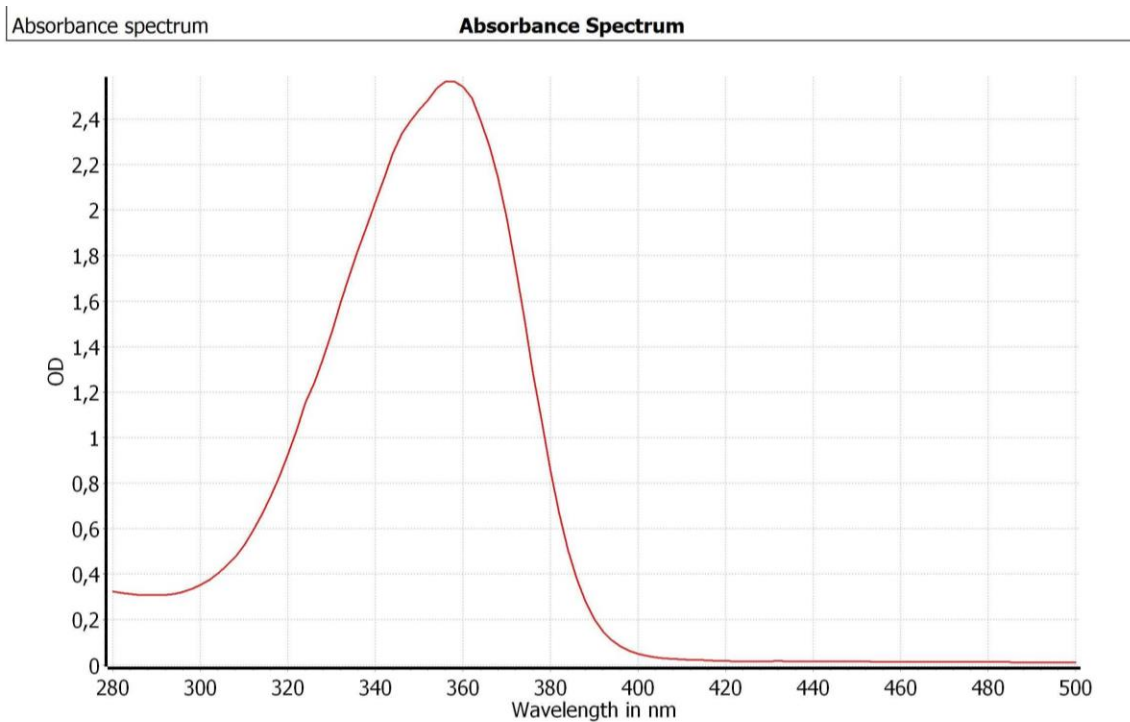

**Figure S57.** The UV-vis absorption spectrum of **19a**.

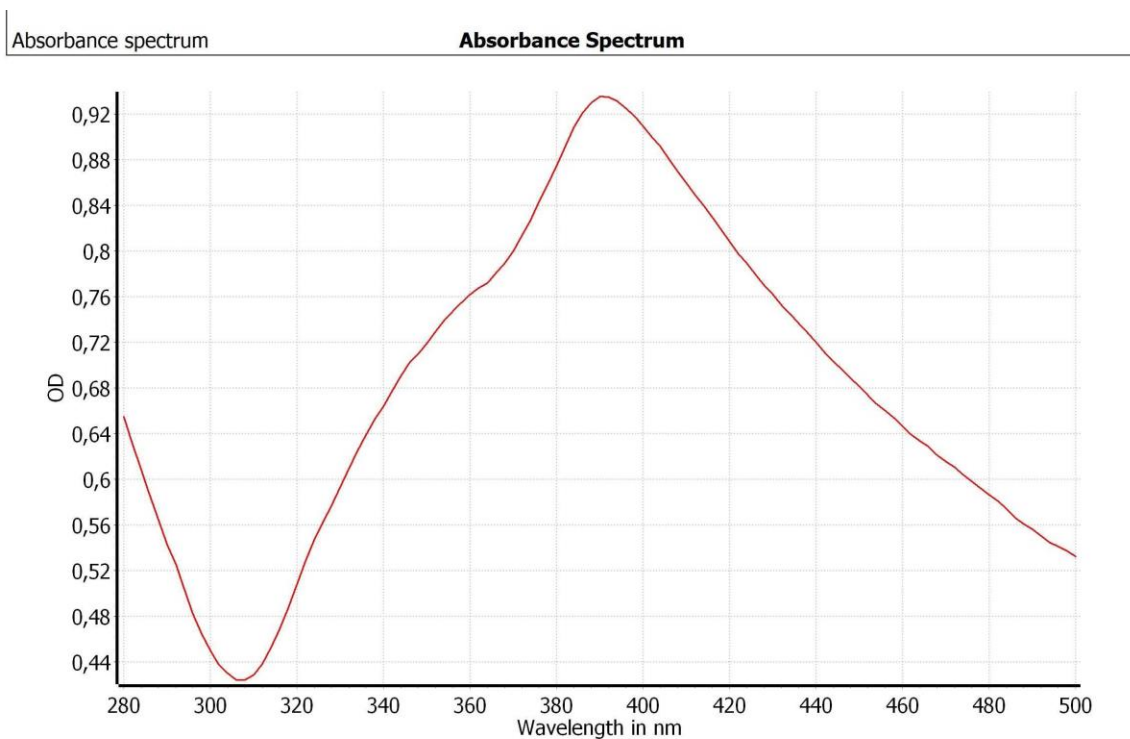

**Figure S58.** The UV-vis absorption spectrum of **20a**.

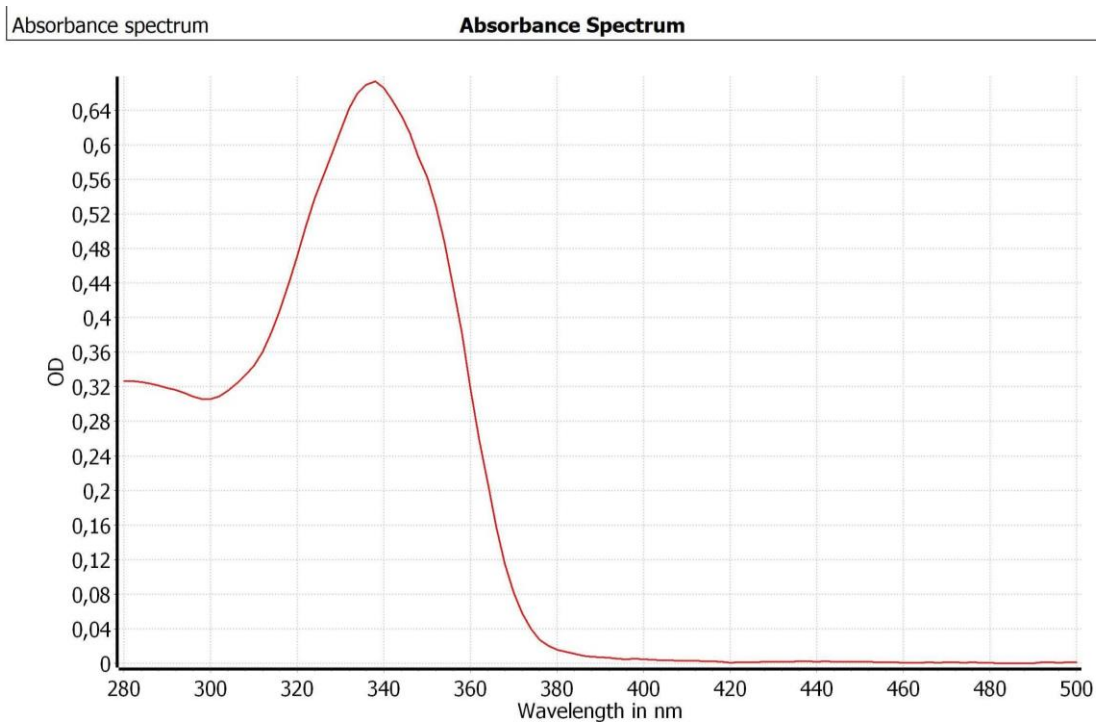

**Figure S59.** The UV-vis absorbption spectrum of **18f**.

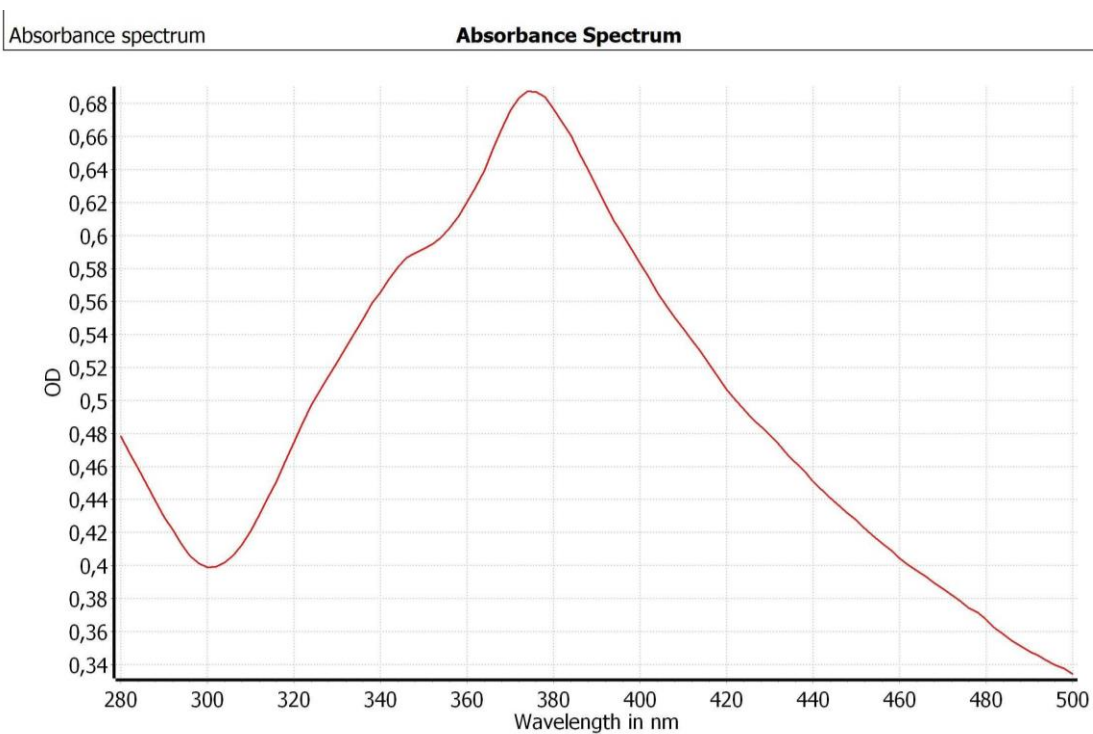

**Figure S60.** The UV-vis absorbption spectrum of **19f**.

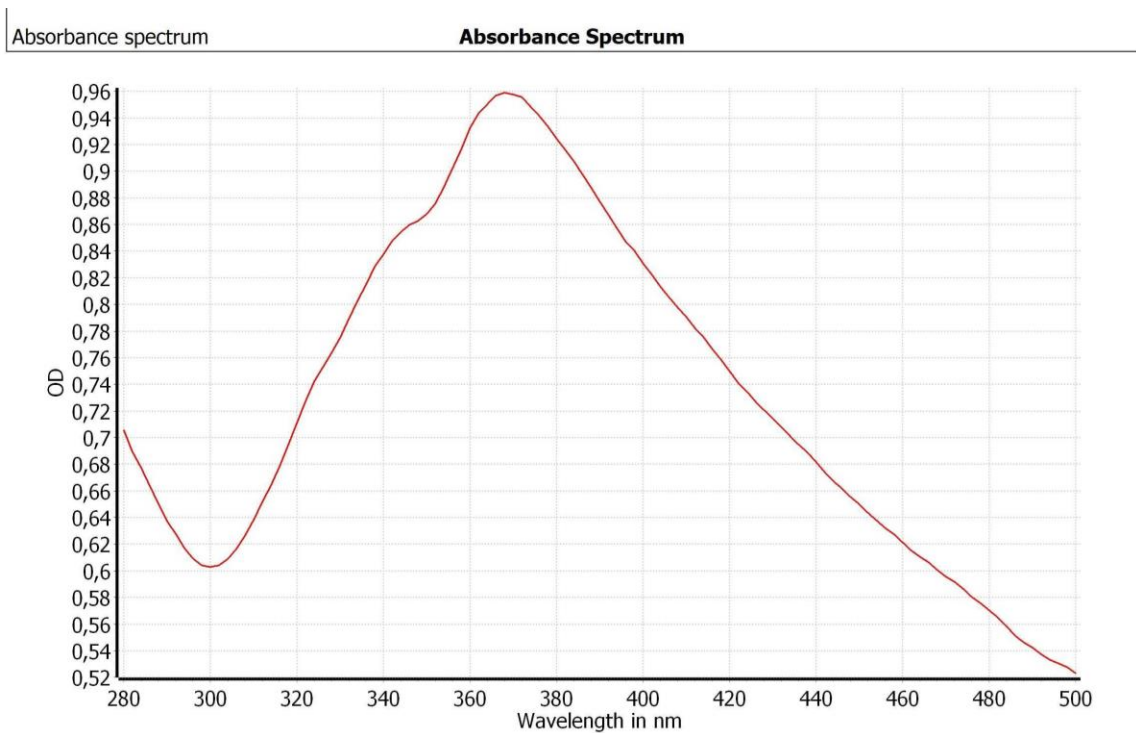

**Figure S61.** The UV-vis absorbtion spectrum of **20f**.

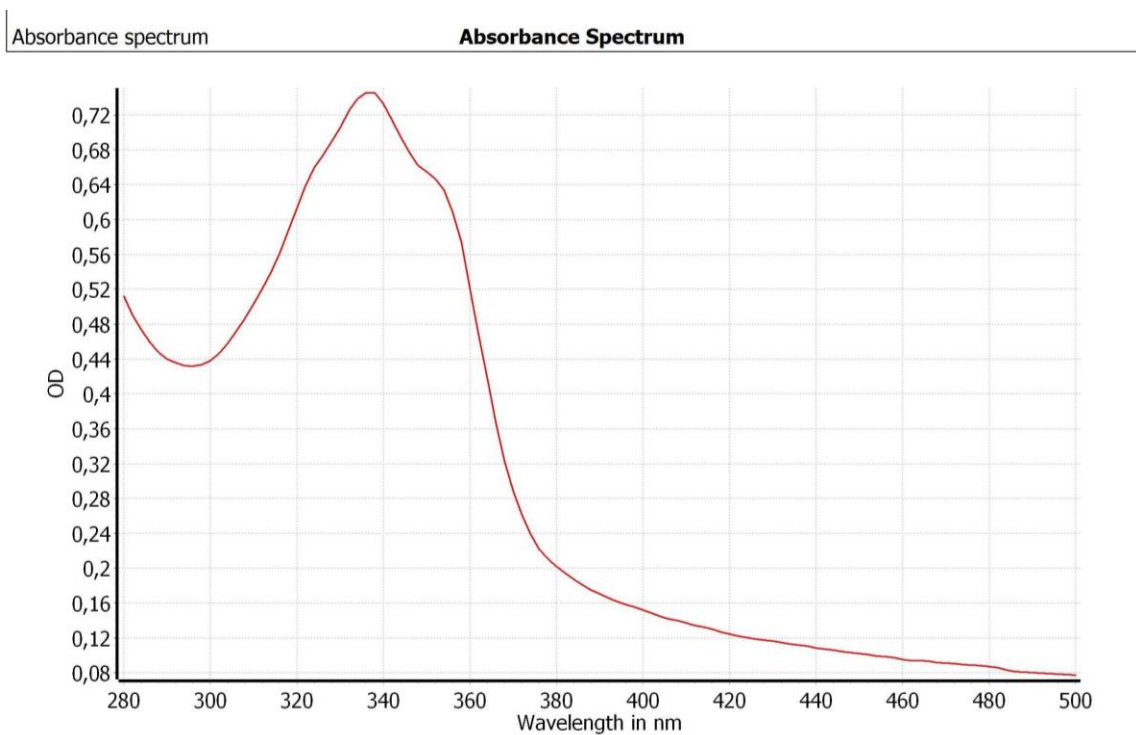

**Figure S62.** The UV-vis absorbtion spectrum of **21f**.



**Table S1.** The binding affinities as predicted by the scoring functions used to the catalytic TDP1 binding pocket and their measured IC<sub>50</sub> values.

| Ligand     | ASP  | ChemPLP | CS   | GS   | IC <sub>50</sub> , $\mu$ M |
|------------|------|---------|------|------|----------------------------|
| <b>18a</b> | 28.5 | 48.6    | 29.7 | 43.4 | > 100                      |
| <b>18b</b> | 23.2 | 46.9    | 24.4 | 41.0 | 1.1 $\pm$ 0.2              |
| <b>18c</b> | 22.9 | 43.0    | 24.6 | 39.3 | > 100                      |
| <b>18d</b> | 24.1 | 45.2    | 26.4 | 40.1 | > 100                      |
| <b>18e</b> | 22.7 | 44.8    | 24.6 | 40.5 | > 100                      |
| <b>18f</b> | 27.5 | 46.4    | 28.4 | 47.7 | > 100                      |
| <b>18g</b> | 30.1 | 60.1    | 27.4 | 48.7 | > 100                      |
| <b>19a</b> | 31.9 | 52.2    | 25.8 | 50.8 | > 100                      |
| <b>19b</b> | 31.1 | 57.3    | 24.1 | 52.4 | 1.9 $\pm$ 0.3              |
| <b>19c</b> | 28.7 | 49.8    | 24.8 | 52.3 | > 100                      |
| <b>19d</b> | 28.5 | 49.9    | 22.9 | 52.9 | > 100                      |
| <b>19e</b> | 30.2 | 47.7    | 25.6 | 52.1 | > 100                      |
| <b>19f</b> | 31.2 | 55.9    | 27.2 | 51.7 | 1.6 $\pm$ 0.3              |
| <b>19g</b> | 33.6 | 54.6    | 27.4 | 52.5 | 2.4 $\pm$ 1.1              |
| <b>20a</b> | 32.2 | 61.7    | 27.4 | 54.4 | 3.4 $\pm$ 0.1              |
| <b>20b</b> | 31.1 | 64.0    | 26.2 | 57.9 | > 100                      |
| <b>20c</b> | 31.0 | 60.3    | 25.0 | 57.0 | > 100                      |
| <b>20d</b> | 32.5 | 63.3    | 24.8 | 57.1 | 0.65 $\pm$ 0.07            |
| <b>20e</b> | 30.6 | 64.9    | 25.7 | 56.2 | 2.9 $\pm$ 0.1              |
| <b>20f</b> | 32.9 | 67.6    | 27.7 | 59.7 | > 100                      |
| <b>20g</b> | 32.2 | 65.3    | 30.4 | 63.7 | 4.1 $\pm$ 0.1              |
| <b>21a</b> | 33.0 | 56.9    | 26.8 | 51.9 | > 100                      |
| <b>21b</b> | 29.1 | 58.6    | 26.9 | 52.2 | 2.5 $\pm$ 0.4              |
| <b>21c</b> | 31.4 | 57.6    | 25.8 | 55.1 | > 100                      |
| <b>21d</b> | 31.2 | 62.4    | 25.8 | 57.9 | 0.55 $\pm$ 0.07            |
| <b>21e</b> | 31.2 | 60.5    | 27.1 | 59.1 | 2.3 $\pm$ 0.1              |
| <b>21f</b> | 31.3 | 60.6    | 28.3 | 54.1 | > 100                      |
| <b>21g</b> | 34.1 | 68.0    | 30.1 | 59.6 | 2.4 $\pm$ 0.1              |

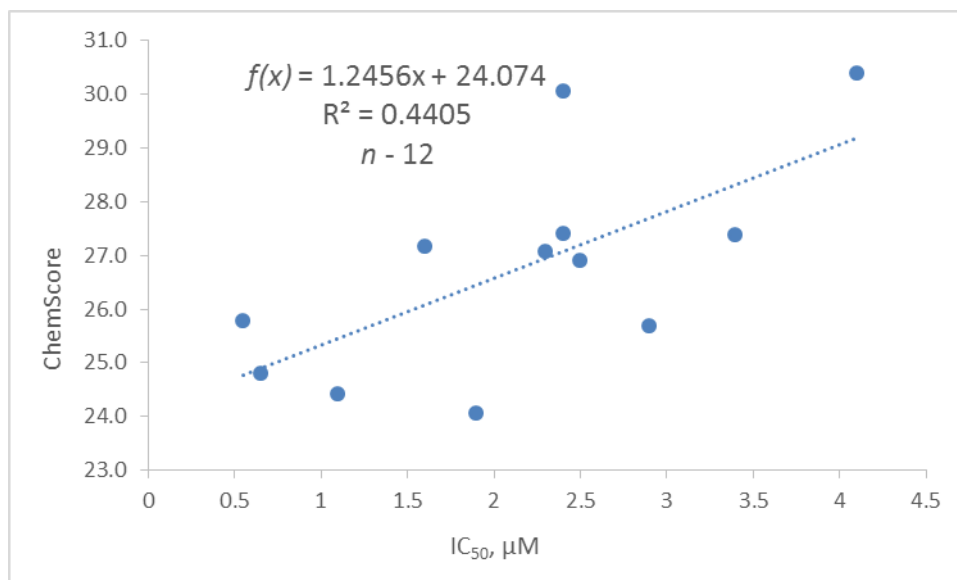

**Figure S63.** The correlation plot of measured  $IC_{50}$  values against their CS counterparts.

**Table S2.** The molecular descriptors and their corresponding Known Drug Indexes 2a and 2b ( $KDI_{2a/2b}$ ).

|            | RB | MW    | HD | HA  | Log P | PSA  | $KDI_{2A}$ | $KDI_{2B}$ | $IC_{50}$ , $\mu M$ |
|------------|----|-------|----|-----|-------|------|------------|------------|---------------------|
| <b>18a</b> | 2  | 195.2 | 1  | 3.5 | 0.9   | 83.7 | 4.38       | 0.10       | > 100               |
| <b>18b</b> | 2  | 290.1 | 1  | 3   | 2.0   | 73.2 | 5.00       | 0.31       | $1.1 \pm 0.2$       |
| <b>18c</b> | 2  | 211.3 | 1  | 3   | 1.4   | 73.2 | 4.48       | 0.13       | > 100               |
| <b>18d</b> | 2  | 290.1 | 1  | 3   | 2.0   | 73.2 | 5.00       | 0.31       | > 100               |
| <b>18e</b> | 2  | 225.3 | 1  | 3   | 1.7   | 73.2 | 4.61       | 0.17       | > 100               |
| <b>18f</b> | 2  | 284.1 | 1  | 3   | 2.0   | 76.4 | 4.98       | 0.30       | > 100               |
| <b>18g</b> | 3  | 251.3 | 1  | 3   | 2.5   | 77.0 | 4.98       | 0.29       | > 100               |
| <b>19a</b> | 4  | 285.3 | 0  | 3.5 | 3.3   | 63.4 | 4.96       | 0.28       | > 100               |
| <b>19b</b> | 4  | 380.3 | 0  | 3   | 4.6   | 54.4 | 4.80       | 0.23       | $1.9 \pm 0.3$       |
| <b>19c</b> | 4  | 301.4 | 0  | 3   | 4.0   | 54.5 | 4.77       | 0.22       | > 100               |
| <b>19d</b> | 4  | 380.3 | 0  | 3   | 4.6   | 54.4 | 4.80       | 0.22       | > 100               |
| <b>19e</b> | 4  | 315.4 | 0  | 3   | 4.3   | 54.3 | 4.75       | 0.22       | > 100               |
| <b>19f</b> | 4  | 374.3 | 0  | 3   | 4.6   | 54.6 | 4.78       | 0.22       | $1.6 \pm 0.3$       |
| <b>19g</b> | 5  | 341.5 | 0  | 3   | 5.1   | 60.0 | 4.65       | 0.18       | $2.4 \pm 1.1$       |
| <b>20a</b> | 7  | 331.4 | 0  | 3.5 | 4.9   | 66.6 | 4.61       | 0.18       | $3.4 \pm 0.1$       |
| <b>20b</b> | 7  | 426.4 | 0  | 3   | 6.0   | 59.4 | 4.14       | 0.08       | > 100               |
| <b>20c</b> | 7  | 347.5 | 0  | 3   | 5.4   | 59.3 | 4.38       | 0.13       | > 100               |
| <b>20d</b> | 7  | 426.4 | 0  | 3   | 6.0   | 59.3 | 4.14       | 0.08       | $0.65 \pm 0.07$     |
| <b>20e</b> | 7  | 361.5 | 0  | 3   | 5.7   | 59.4 | 4.31       | 0.11       | $2.9 \pm 0.1$       |
| <b>20f</b> | 7  | 420.4 | 0  | 3   | 6.0   | 59.3 | 4.14       | 0.08       | > 100               |
| <b>20g</b> | 8  | 387.6 | 0  | 3   | 6.5   | 60.6 | 3.97       | 0.05       | $4.1 \pm 0.1$       |
| <b>21a</b> | 5  | 343.4 | 0  | 3.5 | 4.6   | 67.6 | 4.93       | 0.27       | > 100               |
| <b>21b</b> | 5  | 438.4 | 0  | 3   | 5.7   | 60.5 | 4.37       | 0.11       | $2.5 \pm 0.4$       |
| <b>21c</b> | 5  | 359.5 | 0  | 3   | 5.1   | 60.4 | 4.68       | 0.18       | > 100               |
| <b>21d</b> | 7  | 426.4 | 0  | 3   | 6.0   | 59.3 | 4.14       | 0.08       | $0.55 \pm 0.07$     |
| <b>21e</b> | 5  | 373.5 | 0  | 3   | 5.4   | 59.7 | 4.60       | 0.16       | $2.3 \pm 0.1$       |
| <b>21f</b> | 5  | 432.4 | 0  | 3   | 6.0   | 60.7 | 4.33       | 0.10       | > 100               |
| <b>21g</b> | 6  | 399.6 | 0  | 3   | 6.3   | 59.7 | 4.28       | 0.08       | $2.4 \pm 0.1$       |

**Table S3.** Definition of lead-like, drug-like and Known Drug Space (KDS) in terms of molecular descriptors. The values given are the maxima for each descriptor for the volumes of chemical space used.

|                                            | <b>Lead-like<br/>Space</b> | <b>Drug-like<br/>Space</b> | <b>Known<br/>Drug Space</b> |
|--------------------------------------------|----------------------------|----------------------------|-----------------------------|
| Molecular weight (g mol <sup>-1</sup> )    | 300                        | 500                        | 800                         |
| Lipophilicity (Log P)                      | 3                          | 5                          | 6.5                         |
| Hydrogen bond donors (HD)                  | 3                          | 5                          | 7                           |
| Hydrogen bond acceptors (HA)               | 3                          | 10                         | 15                          |
| Polar surface area (Å <sup>2</sup> ) (PSA) | 60                         | 140                        | 180                         |
| Rotatable bonds (RB)                       | 3                          | 10                         | 17                          |
